1 **A new GABAergic projection from the BNST onto accumbal parvalbumin**  
2 **neurons controls anxiety**

3 Qian Xiao<sup>1,2,#</sup>, Xinyi Zhou<sup>1,2,#</sup>, Pengfei Wei<sup>1,#</sup>, Li Xie<sup>1</sup>, Yaning Han<sup>1,2</sup>, Bifeng  
4 Wu<sup>3</sup>, Jie Wang<sup>4</sup>, Aoling Cai<sup>5</sup>, Fuqiang Xu<sup>4,5</sup>, Yi Lu<sup>1</sup>, Jie Tu<sup>1,6\*</sup>, Liping Wang<sup>1,6\*</sup>

5 <sup>1</sup>*Shenzhen Key Lab of Neuropsychiatric Modulation, Guangdong Provincial Key Laboratory of*  
6 *Brain Connectome and Behavior, the Brain Cognition and Brain Disease Institute (BCBDI),*  
7 *Shenzhen Institutes of Advanced Technology, Chinese Academy of Sciences (CAS);*  
8 *Shenzhen-Hong Kong Institute of Brain Science-Shenzhen Fundamental Research Institutions,*  
9 *Shenzhen, 518055, China.*

10 <sup>2</sup>*University of Chinese Academy of Sciences, Beijing100049, P.R. China;*

11 <sup>3</sup>*Department of information technology and electrical engineering, ETH Zurich;*

12 <sup>4</sup>*State Key Laboratory of Magnetic Resonance and Atomic and Molecular Physics, Wuhan Ins*  
13 *titute of Physics and Mathematics, CAS center for Excellence in Brain Science and*  
14 *Intelligence Technology, Chinese Academy of Sciences, Wuhan 430071, P.R. China;*

15 <sup>5</sup>*Wuhan National Laboratory for Optoelectronics, Huazhong University of Science and*  
16 *Technology, Wuhan 430074, P.R. China.*

17 <sup>6</sup>*Lead contact*

18

19 Running title: BNST<sup>GABA</sup> projection to NAc<sup>PV</sup> controls avoidance of anxiogenic  
20 stimuli

21 Word counts: abstract; text; acknowledgments

22 Number of tables: 0

23 Number of figures: 6

24 Supplementary files: 6

25 Total text words count: 12710

26 \*Correspondence: Jie Tu, PhD, E-mail: jie.tu@siat.ac.cn

27 Liping Wang, MD, PhD, E-mail: lp.wang@siat.ac.cn

28 #Equal contribution.

29

1 **Abstract**

2 The prevailing view is that parvalbumin (PV) interneurons play modulatory  
3 roles in emotional response through local medium spiny projection neurons  
4 (MSNs). Here, we show that PV activity within the nucleus accumbens shell  
5 (sNAc) is required for producing anxiety-related avoidance when mice are  
6 under anxiogenic situations; sNAc<sup>PV</sup> neurons exhibited high excitability in  
7 chronically stressed mice model, which generated excessive maladaptive  
8 avoidance behavior in an anxiogenic context. We also discovered a novel  
9 GABAergic projections from the anterior dorsal bed nuclei of stria terminalis  
10 (adBNST) to sNAc<sup>PV</sup> neurons; optogenetic activation of these afferent  
11 terminals in sNAc produced an anxiolytic effect via GABA transmission. Next,  
12 we further demonstrated that chronic stressors attenuated the inhibitory  
13 synaptic transmission at adBNST<sup>GABA</sup> → sNAc<sup>PV</sup> synapses, which in turn  
14 explains the hyperexcitability of sNAc<sup>PV</sup> neurons on stressed models; therefore,  
15 activation of these GABAergic afferents in sNAc rescued the excessive  
16 avoidance behavior related to anxious state.

17 Our findings reveal the coordination between BNST and NAc through an  
18 inhibitory architecture in controlling of anxiety-related response and provide a  
19 neurobiological basis for therapeutic interventions in pathological anxiety.

## 1 Introduction

2 Stressors and stress responses are critical for guiding both approach and  
3 avoidance behaviors in animals and humans. Exposure to chronic,  
4 unpredictable stressors leads to increased anxiety responses, including  
5 excessive avoidance behavior, and this exposure has been adopted to study  
6 anxious state-related behaviors<sup>1, 2</sup>. The bed nucleus of the stria terminalis  
7 (BNST), a subregion of the extended amygdala, is a critical node in the stress  
8 response<sup>3, 4</sup>. Recent work on human drug addiction has also demonstrated a  
9 role of BNST in withdrawal-related anxiety and relapse, indicating an intrinsic  
10 link between this stress response region and the reward system. The nucleus  
11 accumbens (NAc) is a vital component in the reward circuitry<sup>5-7</sup>, which  
12 responds to stress signals<sup>8, 9</sup> and has a dominant effect on anxiety regulation<sup>10</sup>.  
13 However, with the exception of one 15-year-old anatomical observation<sup>11</sup>, the  
14 connectivity between NAc and BNST, and whether it is necessary in producing  
15 anxiety-related behavior, remains unexplored. Furthermore, GABAergic  
16 efferents originating from the BNST are predominantly sent downstream<sup>12, 13</sup>;  
17 however, the nature and function of any GABAergic input to NAc is unknown.  
18 Medium spiny neurons that express dopamine 1 and 2 receptors (D1- and  
19 D2-MSNs) are the predominant neural population in the NAc. Regarding  
20 anxiety regulation, it is accepted that D1-MSNs are not involved in  
21 anxiety-related behavior, but play roles in modulating reward-related  
22 responses<sup>14, 15</sup> whereas D2-MSNs may regulate anxiety-related aversion or

1 avoidance behavior<sup>16</sup>. However, the role of D2-MSNs are not entirely clear  
2 because other work points to a role in reward seeking, but not anxiety-related  
3 behavior<sup>17, 18</sup>. Based on these very different findings, we predicted that there is  
4 another neuronal type within the NAc that contributes to anxiety-related  
5 behavior. One possibility is PV GABAergic interneurons, which comprise only  
6 3-4% of all neurons in the NAc<sup>19, 20</sup>. In other brain regions, these neuron  
7 regulate fear response<sup>21</sup>, anxiolysis<sup>22</sup>, alcohol addiction<sup>23</sup>, and reward seeking<sup>3,</sup>  
8 <sup>24</sup>. However, we know less about the function of accumbal PV neurons and the  
9 inputs they receive, and nothing about any possible role in anxiety related  
10 behavior.

11 We addressed these important questions regarding the neural mechanisms  
12 underlying the expression of avoidance of anxiogenic stimuli in both healthy  
13 and pathological anxiety models. Combining functional MRI signaling,  
14 GCaMP-based fiber photometry recording, genetically modified virus tracing  
15 and both optogenetic and chemogenetic neuronal manipulations, we show that  
16 in an anxious state, functional connectivity between BNST and NAc was  
17 increased; PV neurons within the NAc shell (sNAc) exhibited high excitability in  
18 chronically stressed mouse model that displayed excessive maladaptive  
19 avoidance during anxiogenic stimuli; and further, activation of these accumbal  
20 PV neurons promoted an avoidance coping response in healthy mice. A new  
21 GABAergic afferent from the anterior dorsal BNST (adBNST) was uncovered,  
22 which directly innervates sNAc<sup>PV</sup> neurons. Optogenetic activation of these

1 GABAergic terminals in sNAc produced an anxiolytic effect, which was  
2 mediated by sNAc<sup>PV</sup> cells; activation of these inhibitory inputs from adBNST to  
3 sNAc rescued the excessively anxious state of the stressed mice.

4 Therefore, our results reveal a previously undescribed circuit mechanism,  
5 defined by neuronal type, that shapes the coordination between BNST<sup>GABA</sup> and  
6 NAc<sup>PV</sup> cells in response to anxiogenic stimuli under both physiological and  
7 pathological conditions.

8

## 9 **Materials and methods**

10

### 11 **Mouse Models**

12

13 All experiments were approved by the Shenzhen Institutes of Advanced  
14 Technology, Chinese Academy of Sciences Research Committee, and all  
15 experimental procedures involving animals were carried out in strict  
16 accordance with the Research Committee's animal use guidelines. Surgery  
17 was performed under full anesthesia, and every effort was made to minimize  
18 animal suffering. Male and female mice (6-14 weeks) were used in this study.  
19 We used the following mouse lines : PV-Cre (B6;129P2-Pvalbtm1(cre)Arbr/J,  
20 Jackson Laboratory, stock No.008069), D1-Cre  
21 (B6.Cg-Tg(Drd1a-cre)262Gsat/Mmcd, MMRRC, 030989-UCD), D2-Cre  
22 (B6.FVB(Cg)-Tg(Drd2-cre)ER44Gsat/Mmcd, MMRRC,032108-UCD),,  
23 C57BL/6J wild-type mice were also used.

### 24 **Behavioral tests**

1 All behavioral tests were performed blind to mice genotypes. Groups of mice  
2 were age-matched (8-14 weeks). All mice were handled for 15-30 min per day  
3 for three days before behavioral assays to reduce stress introduced by contact  
4 with experimenter.

5 **1) Elevated plus maze test**

6 A plastic elevated plus maze consisting of a central platform (5×5 cm) with  
7 two white open arms (25×5×25 cm) and two white closed arms (25×5×25 cm)  
8 extending from it in a plus shape was used. The maze was elevated 65 cm  
9 above the floor. Mice were individually placed in the center with their heads  
10 facing a closed arm. The number of entries and the amount of time spent in  
11 each arm type were recorded.

12 **2) Open-field test**

13 A plastic open field chamber (50×50 cm) was used and conceptually divided  
14 into a central field (25×25 cm) and a peripheral field for analysis. Each mouse  
15 was placed in the peripheral field at the start of each test. The open field test  
16 consisted of a 10 min session and mice locations were monitored/tracked  
17 using Anymaze software.

18 **3) Unpredictable chronic mild stress procedure (UCMS)**

19 The UCMS protocol was performed as previously described<sup>51, 52</sup> with  
20 modification. Mice were exposed to environmental stressors for three weeks.  
21 One of the following stressors were presented during each daily session in a  
22 random order over three weeks: (i) restraint, where each mouse was placed in

1 a tube (50 mL) for two hours without access to food or water, (ii) a wet  
2 environment where water was added (such that bedding was damp but not  
3 overly wet) to a housing cage containing mice for twelve hour sessions, and (iii)  
4 squeezing, where four mice were housed into a box (3 × 5 × 7 cm) for two  
5 hours, without access to food or water.

6

### 7 **Fiber photometry**

8 Fiber photometry allows for real-time excitation and recording of fluorescence  
9 from genetic encoded calcium indicators in freely moving mice. Mice were  
10 habituated to the fiber patch cord for at least 15 min per day for three days  
11 before tests were conducted inside home cages. The fiber photometry system  
12 (ThinkerTech, Nanjing, China) consisted of an excitation LED light (480 nm;  
13 CREE XPE), reflected off a dichroic mirror with a 435-488 nm reflection band  
14 and a 502-730 nm transmission band (Edmund, Inc), coupled into a 200 μm  
15 0.37 NA optical fiber (Thorlabs, Inc) by an objective lens. The laser intensity at  
16 the fiber tip was approximately 25-30 μW. GCaMP6<sub>m</sub> fluorescence was  
17 recorded using the same objective, transmitted by the dichroic mirror filtered  
18 through a green fluorescence protein (GFP) bandpass emission filter (Thorlabs,  
19 Inc. Filter 525/39), and detected by the sensor of an CMOS camera (Thorlabs,  
20 Inc. DCC3240M).

21 A Labview program was developed to control the CMOS camera which  
22 recorded calcium signals at 50 Hz. Behavioral event signals were recorded by

1 a DAQ card (NI, usb-6001) at 1000 Hz using the same program.

2 **Single-unit and local field potential (LFP) recordings in freely-moving**  
3 **mice**

4 Both naive and chronically stressed mice (aged 8-12 wk) were anesthetized  
5 with isoflurane (4.0% for induction and set-up on the animal bed, 0.8%-1%  
6 during experiments) in a 20% O<sub>2</sub>/80% air mixture). Body temperature was  
7 maintained at 36-37 °C with a heating pad. For single-unit recording, mice  
8 were secured in a stereotaxic apparatus and a custom-made screw-driven  
9 microdrive containing eight tetrodes (four wires wound together) was  
10 unilaterally implanted in the left NAc shell; and for LFP recordings,  
11 custom-made stereotrodes (two wires wound together) were unilaterally  
12 implanted in both left NAc shell and aBNST. Each stereotrode was housed in a  
13 silica tube and consisted of two individually insulated platinum-iridium wires  
14 (17 µm inner diameter). The electrodes were modified by electrochemical  
15 deposition of platinum to reduce their impedance to ~500 KΩ. The skull was  
16 leveled using bregma and lambda landmarks, and screws were implanted on  
17 the anterior and posterior portions of the skull to serve as reference.  
18 Coordinates were measured from bregma and depth was calculated from the  
19 brain surface. The electrodes were implanted through burr holes in the skull  
20 aimed at the following coordinates: AP 1.35 mm, ML 1.35 mm, and DV -4.85  
21 mm for NAc shell and AP 0.20 mm, ML 0.80 mm, and DV -4.05 mm for aBNST.  
22 The microdrive electrode was attached to a micromanipulator and moved



1 gradually to a position about 400  $\mu\text{m}$  above the desired depth. The electrodes  
2 were anchored to the microdrive that made it possible to advance along the  
3 dorsal-ventral coordinates. Following surgery, mice were allowed to recover for  
4 at least one week and were then habituated to experimenter handling. During  
5 recording, electrodes were connected to a unitary gain headstage (Plexon,  
6 Dallas, TX) connected to a 32-channel preamplifier (Plexon, Dallas, TX). Once  
7 mice were familiar with the recording setup they were connected to the  
8 headstage preamplifier in their home cages for two daily sessions of 20 min  
9 each. Neurophysiological signals were recorded with a 64-channel  
10 Multichannel Acquisition Processor (Plexon, Dallas, TX) and mouse positions  
11 were tracked using an overhead camera (30 Hz). Wideband signals were  
12 recorded at 40 kHz and LFP signals were acquired at 1 kHz.

13 At the end of each experiment, each mouse was deeply anesthetized with 10%  
14 chloral hydrate (0.4 mg/kg) and transcardially perfused with PBS, then 4%  
15 paraformaldehyde (PFA) (wt/vol). Brains were dissected and postfixed at 4 °C  
16 in 4% PFA overnight. Brains were then frozen and cut into 40  $\mu\text{m}$  coronal slices  
17 and mounted on slides. Recording sites were marked with electrolytic lesions  
18 prior to perfusion and examined under a microscope to confirm recording  
19 locations.

20

## 21 **Resting state MRI**

22 All mice were initially anesthetized with isoflurane (4.0% for induction and

1 set-up on the animal bed, 0.8%-1% during experiments) in a 20% O<sub>2</sub>/80% air  
2 mixture. Body temperature was maintained at 37 °C using warm water circuitry.  
3 MRI experiments were conducted using a Bruker Biospec70/20USR small  
4 animal MR system (Bruker BioSpin MRI, Ettlingen, Germany) operating at 300  
5 MHz (7T). Breathing rate, heart rate and blood oxygen saturation were  
6 monitored using a pulse oximeter positioned at the hind limb and a  
7 pressure-sensitive sensor under the mouse chest (MR-compatible Small  
8 Animal Monitoring & Gating System, SA Instruments, Inc.).  
9 A planar receive-only surface coil with 20 mm diameter was used in  
10 combination with a detunable partial volume transmit coil (BrukerBioSpin MRI,  
11 Ettlingen, Germany). T2 anatomical reference scans in the coronal plane were  
12 acquired using a spin echo (Turbo-RARE) sequence: field of view (FOV) =  
13 18×18 mm<sup>2</sup>, matrix dimension (MD) = 256×256, repetition time (TR)= 5000 ms,  
14 echo time (TE) = 12 ms, RARE factor = 8, number of averages (NA) = 4,  
15 spatial resolution = 0.0703125×0.0703125×0.8 mm<sup>3</sup>, 12 slices, no gap.  
16 Resting state data sets were then acquired using single shot gradient echo EPI  
17 (Echo Planar Imaging) with TR 1000 ms and TE 16 ms. Twenty coronal slices  
18 (using the same procedure as the T2 anatomical images above) were  
19 recorded with a FOV of 1.8×1.8 mm<sup>2</sup> and matrix size of 64×64, resulting in  
20 voxel dimensions of 0.28125×0.28125×0.8 mm<sup>3</sup>. Each resting state fMRI  
21 dataset comprised 300 repetitions, resulting in a scanning time of 10 min 40 s  
22 each. The bandwidth used was 200 kHz (6250 Hz/voxel). Preprocessing was

1 done using SPM12 (<http://www.fil.ion.ucl.ac.uk/spm/software/spm12/>) to  
2 eliminate head movement and image shift by co-registering with the  
3 anatomical image, and then Gaussian smoothing was performed for every  
4 slice to improve the signal to noise ratio. To estimate functional connectivity,  
5 4-5 voxels in each bilateral NAc image were selected as ROI (seed points),  
6 using REST (<http://restfmri.net/forum/index.php>) and home-written algorithms  
7 using Matlab2014a ([www.mathworks.com](http://www.mathworks.com)).

8

### 9 **Stereotactic virus injection and optogenetic manipulation**

10 Cre-mice (6-12 weeks) were used for stereotactic viral injections in the NAc  
11 shell. During isoflurane anesthesia (as above), the skull was exposed via small  
12 incision and a small hole was drilled for injection. A modified microliter syringe  
13 (Hamilton) with a 22-gauge needle was used: the tip of the needle was placed  
14 at the target region and the injection was performed at a speed of 100 nl/min  
15 using a micromanipulator (for coordinates and volumes see below). The  
16 needle was left in place for 10 min after injection. Viral injections were  
17 unilateral for optogenetic, fiber photometry, slice-physiology connectivity and  
18 rabies mapping experiments. For DREADD and taCasp3 experiments the viral  
19 injections were bilateral. For optogenetic and fiber photometry experiments,  
20 mice were also implanted with a unilateral fiber optic cannula secured to the  
21 skull with dental cement. Fiber optic cannulas were 200  $\mu\text{m}$  for optogenetic  
22 and fiber photometry experiments. We used the following stereotactic

1 coordinates (in mm): NAc (AP +1.35, ML  $\pm$ 1.35, DV -5.05 (virus) and -4.85  
2 (fiber optic)), aBNST (AP +0.20, ML +0.80, DV -4.05 (virus)).  
3 Adeno-associated viruses (AAVs) carrying Cre-inducible (double-inverse  
4 orientation; DIO) transgenes were packaged in our laboratory (AAVs for  
5 optogenetics, DREADD, taCasp3) or purchased from BrainVTA (Wuhan, China.  
6 <http://brainvta.com>) (AAVs for retrograde tracing or fiber photometry).  
7 Glycoprotein-deleted rabies virus for retrograde tracing (RV-ENVA- $\Delta$ G-dsRed  
8  $2.0 \times 10^8$  IFU/mL) was also purchased from BrainVTA.

9

#### 10 ***In vivo* anesthetized electrophysiology**

11 Adult mice (8-12 weeks) were anesthetized with isoflurane (4.0% for  
12 induction and set-up on the animal bed, 0.8%-1% during experiments) in a 20%  
13 O<sub>2</sub>/80% air mixture). Once anesthetized, mice were placed into a stereotactic  
14 frame and body temperature was maintained at ~ 37 °C using a heating pad. A  
15 recording electrode was implanted into the NAc shell and a reference  
16 electrode was implanted in the contralateral NAc shell. Optical  
17 stimulation-induced neuronal activity was measured by calculating the firing  
18 rate 10 s before the stimulus and 40 s during the stimulus and the time bin of  
19 the firing rate was set to 500 ms. To determine when a single unit significantly  
20 responded to the optical stimulus, we used the criterion that the unit's *P*-value  
21 of the ranksum test needed to be less than 0.05. The average firing rate of  
22 each group of neurons was calculated after normalizing the firing rate of each

1 unit by Z-score method. To further examine the optical response for the  
2 classified neurons, the optical-induced firing probability were also calculated  
3 with the parameters of 15 ms pre-time, 15 ms post-time, and 0.1 ms time bin.  
4

## 5 **Patch-clamp electrophysiology**

6 Coronal slices (300  $\mu$ M) containing NAc shell (bregma 1.7 to 0.6 mm) were  
7 prepared from *PV-Cre* transgenic mice using standard procedures. Brains  
8 were quickly removed and chilled in ice-cold modified artificial cerebrospinal  
9 fluid (ACSF) containing (in mM): 110 Choline Chloride, 2.5 KCl, 1.3 NaH<sub>2</sub>PO<sub>4</sub>,  
10 25 NaHCO<sub>3</sub>, 1.3 Na-Ascorbate, 0.6 Na-Pyruvate, 10 Glucose, 2 CaCl<sub>2</sub>, 1.3  
11 MgCl<sub>2</sub>. NAc slices were then cut in ice-cold modified ACSF using a Leica  
12 vibroslicer (VT-1200S). Slices were allowed to recover for 30 min in a storage  
13 chamber containing regular ACSF at 32~34 °C (in mM): 125 NaCl, 2.5 KCl, 1.3  
14 NaH<sub>2</sub>PO<sub>4</sub>, 25NaHCO<sub>3</sub>, 1.3 Na-Ascorbate, 0.6 Na-Pyruvate, 10 Glucose, 2  
15 CaCl<sub>2</sub>, 1.3 MgCl<sub>2</sub> (pH 7.3~7.4 when saturated with 95% O<sub>2</sub>/5% CO<sub>2</sub>), and  
16 thereafter kept at ~25 °C until placed in the recording chamber. The osmolarity  
17 of all the solutions was 300~320 mOsm/Kg.

18 For all electrophysiological experiments, slices were viewed using infrared  
19 optics under an upright microscope (Eclipse FN1, Nikon Instruments) with a  
20 40x water-immersion objective. The recording chamber was continuously  
21 perfused with oxygenated ACSF (2 ml/min) at 34 °C. Pipettes were pulled by a  
22 micropipette puller (Sutter P-2000 Micropipette Puller) with a resistance of 3-5

1 M $\Omega$ . Recordings were made with electrodes filled with intracellular solution (in  
2 mM): 130 potassium gluconate, 1 EGTA, 10 NaCl, 10 HEPES, 2 MgCl<sub>2</sub>, 0.133  
3 CaCl<sub>2</sub>, 3.5 Mg-ATP, 1 Na-GTP. Inhibitory postsynaptic potentials (IPSPs) were  
4 recorded with PV cells held at 30 pA and the recording electrodes (7–9 M $\Omega$ )  
5 were filled with a solution containing (in mM): 120 cesium methansulphonate,  
6 20 HEPES, 0.4 EGTA, 2.8 NaCl, 5 tetraethylammonium chloride, 2.5 MgATP,  
7 0.25 NaGTP (pH 7.4, 285 mOsm/kg). AP-5 (25  $\mu$ M) and NBQX (25  $\mu$ M) were  
8 added to the ACSF during IPSP recording. IPSPs were blocked by adding 20  
9  $\mu$ M bicuculline (GABA<sub>A</sub> receptor antagonist). Action potential firing frequency  
10 was analyzed in current-clamp mode in response to a 2 s depolarizing current  
11 step. Rheobase was determined as the amplitude of a minimum current step  
12 (advanced in 10 pA increments) to elicit an action potential response. All  
13 recordings were conducted with a MultiClamp700B amplifier (Molecular  
14 Devices). Currents were low-pass filtered at 2 kHz and digitized at 20 kHz  
15 using an Axon Digidata 1440A data acquisition system and pClamp 10  
16 software (both from Molecular Devices). Series resistance (R<sub>s</sub>) was 10–30 M $\Omega$   
17 and regularly monitored throughout the recordings. Data were discarded if R<sub>s</sub>  
18 changed by >25% over the course of data acquisition.

19

## 20 **Measurements of norepherine (NE) and Corticotropin-releasing hormone** 21 **(CRH)**

22 Blood samples were collected from naive and stressed mice. Serum was

1 prepared after each blood sample was centrifuged at 1000 rpm. Serum  
2 aliquots were immediately frozen at  $-80^{\circ}\text{C}$  prior to being used. NE and CRH  
3 in the serum were determined using the Radioimmunoassay Kits (Xinfan  
4 Biotechnology Co., Ltd, Shanghai, China) in accordance with the  
5 manufacturer's instructions.

6

### 7 **Histology and confocal microscopy**

8 Mice were deeply anesthetized and transcardially perfused with ice-cold 4%  
9 paraformaldehyde (PFA) in PBS (pH 7.4). Brains were fixed overnight in 4%  
10 PFA solution and then equilibrated in 30% sucrose in PBS. Next, 30  $\mu\text{m}$   
11 coronal slices were cut using a freezing microtome. Slices were stored in a  
12 cryoprotection solution at  $4^{\circ}\text{C}$  until further processed. The sections were  
13 incubated with primary antibodies overnight at  $4^{\circ}\text{C}$ . Alexa Fluor<sup>®</sup> 488, 594 or  
14 647-conjugated goat anti-rabbit or anti-mouse IgG antibodies (1:500;  
15 Invitrogen, CA, USA) were the secondary antibodies. Nuclei were  
16 counterstained using DAPI. Immunostaining was performed using mouse  
17 anti-parvalbumin (1:300, Millipore, MA, USA), rabbit anti-choline  
18 acetyltransferase (1:200, Abcam, ab6168). Histological slides were imaged on  
19 a (Zeiss LSM880) confocal microscope using a 10x, 20x or 63x objective.

20

### 21 **Retrogradely monosynaptic tracing**

22 For monosynaptic retrograde tracing, 100 nl of mixed helper AAV

1 (Ef1a-DIO-His-EGFP-2a-TVA-WPRE-pA and Ef1 $\alpha$ -DIO-RVG-WPRE-pA)  
2 (BrainVTA) was injected into the NAc shell of PV-Cre transgenic mice using  
3 coordinates of +1.35 AP, +1.35 ML, and -5.05 DV. Three weeks later, rabies  
4 virus EnvA-pseudotyped RV- $\Delta$ G-DsRed (200  $\mu$ nl) (BrainVTA) was injected into  
5 the NAc shell using the same coordinates. Approximately seven days after the  
6 second injection, mice were anaesthetized with 10% chloral hydrate (0.4  
7 mg/kg) and transcardially perfused with PBS, then 4% PFA (wt/vol) and then  
8 brain slices were prepared for tracing with dsRed.

9

#### 10 ***In situ* hybridization**

11 We used single-probe in situ hybridization on fixed frozen sections. Coding  
12 region fragments of Gad1, Gad2, Vglut1, Vglut2 and CRH were isolated from  
13 mouse brain cDNA using PCR and cloned into the pCR4 Topo vector (Thermo  
14 Fisher). Digoxigenin (DIG)-labeled riboprobes were prepared using a DIG RNA  
15 Labeling Kit (11277073910, Roche). Brain sections were hybridized to  
16 DIG-labeled cRNA probes at 56 °C for 14-16 hr. After hybridization, sections  
17 were washed twice in 0.2 x SSC at 65 °C for 20 min and then incubated with  
18 horseradish peroxidase (POD)-conjugated sheep anti-DIG antibodies (1:300;  
19 1207733910, Roche) diluted in blocking buffer (1% Blocking reagent, FP1012,  
20 Perkin Elmer) for 45 min at room temperature (RT). Sections were washed  
21 three times for five minutes at RT in PBST (0.05% Tween 20 in 1 X PBS) wash  
22 buffer, and then treated using a TSA-plus Cy5 kit (1:100; NEL745001KT,



1 Perkin Elmer) for 10 min at RT. Sections were washed two times for five  
2 minutes at RT in PBST and then incubated with Anti-RFP antibody (1:200;  
3 ab62341, Abcam) for 1.5 hr at RT, and washed. Sections were incubated with  
4 Alexa Fluor 594-conjugated goat anti-rabbit IgG antibodies (1:200;  
5 115-587-003, Jackson Immuno Research) for 1 hr at RT. Sections were  
6 mounted in Fluoromount-G (0100-20, Southern Biotech) and then imaged  
7 using LSM 880 confocal microscopes (Zeiss, LSM880).

8

## 9 **STATISTICAL ANALYSIS**

10 All statistical parameters for specific analyses are described in the  
11 appropriate figure legends.

12

### 13 **EPM score**

14 ANOVAs were used to identify neurons regulated by the EPM arm types and  
15 were calculated using the firing rate of each neuron with a three level factor  
16 (closed arms, open arms and center zone) after each neuron's spike train was  
17 binned into 3 s bins<sup>53</sup>. A neuron's firing rate was considered to be influenced by  
18 EPM position if the rate in one maze area was statistically significantly higher  
19 than that in the others (closed arms versus open arms and center zone, open  
20 arms versus closed arms and center zone, center zone versus closed arms  
21 and open arms, Bonferroni post hoc test, \*\*\* $P < 0.001$ )<sup>53</sup>. EPM scores were  
22 used to quantify the degree to which a neuron can distinguish the structure of

1 the EPM<sup>49, 53</sup>; EPM scores were calculated as previously described<sup>49, 54</sup>.

2 Score = (A-B) / (A+B), where

3  $A = 0.25 \times (|F_L - F_U| + |F_L - F_D| + |F_R - F_U| + |F_R - F_D|)$  and

4  $B = 0.5 \times (|F_L - F_R| + |F_U - F_D|)$ .

5 Horizontal and vertical arms represent closed and open arms, respectively.  $F_R$ ,

6  $F_L$ ,  $F_D$  and  $F_U$  are the % differences from mean firing rate in right, left, down

7 and up arms, respectively; A is the mean difference in normalized firing rate

8 between different-type arms and B is the mean difference for same-type arms.

9 Neurons with firing patterns related to the EPM task have a high EPM score,

10 as neurons will have similar firing rates in the same arm types (resulting in a

11 small B value) and large differences in rates between different arm types

12 (resulting in a large A value). The maximum EPM score of 1.0 shows no

13 difference in firing rate across arms of the same type (B = 0). Negative EPM

14 scores show that firing rates were more similar across arms of different types

15 than across arms of the same type.

16 We calculated whether there was a statistically significant difference between

17 the population of experimentally observed EPM scores from that expected by

18 chance using a bootstrapping method. For each unit that had n spikes, 500

19 simulated EPM scores were generated by calculating the EPM score of n

20 randomly chosen time stamps 500 times. 500 × 98 EPM scores were

21 generated from 98 units recorded. Statistical differences between

22 experimentally observed EPM scores of all neurons and chance were

1 calculated by comparison to the simulated distribution of EPM scores using the  
2 Wilcoxon rank-sum test<sup>49, 53</sup>.

3 The firing pattern of NAc neurons at transitions between different types of  
4 EPM arms and Z-scores of firing rate were calculated for each unit for 10 s and  
5 averaged over total transitions for each unit. We identified a point where there  
6 was a change in the slope of the averaged z-scores. The averaged z-scores  
7 were divided into two parts by using this identified change point and a  
8 nonparametric Kolmogorov-Smirnov test was used to evaluate whether there  
9 were statistically significance differences between the means from these two  
10 data segments. This was calculated using 0.25 s bins.

11

## 12 ***In vivo* calcium signal analysis**

13 Within each heat map, every row was normalized from 0 to 1 according to  
14 the formula  $(D - D_{\min}) / (D_{\max} - D_{\min})$ , where  $D$  is the raw fiber photometry signal  
15 data,  $D_{\min}$  is the minimum value of a given row and  $D_{\max}$  is the maximum value  
16 of the same row. We sorted every row according to the time of peak value from  
17 late to early. To compact the heat map, we inserted one thousand data points  
18 between every two points of raw data by applying cubic spline methods. The  
19 raw heatmap data were normalized by Z-Score normalization. The formula for  
20 Z-Score is  $(D - \mu) / \sigma$ , where  $D$  is the raw fiber photometry signal data,  $\mu$  is the  
21 mean value of raw data and  $\sigma$  is the standard deviation of raw data. The  
22 Z-Score data was divided into two even parts by time zero (defined by the time

1 that mouse moved from closed arm to center zone). To visualize the mean  
2 recording traces from the activity of different NAc neuronal populations in the  
3 EPM, the first three seconds was chosen as a baseline and then Z-Score  
4 normalization was applied to all data using the  $\Delta F/F = (F - F_0)/F_0$  method, where  
5  $F$  is the normalized fiber photometry signal data and  $F_0$  is the mean normalized  
6 data value. All calculations were performed using MATLAB 2017a, GraphPad  
7 Prism7 and SPSS 18.

8

### 9 **Single-unit spike sorting and analysis**

10 Single-unit spike sorting was performed using Offline sorter (Plexon).  
11 Wideband signals were high-pass filtered (300 Hz) with a Bessel filter for  
12 detection of the spikes. The threshold value for spike detection was -4.5  
13 standard deviations and spike waveforms were recorded for a time window of  
14 1400  $\mu$ s starting 300  $\mu$ s before threshold crossing. Principal component values  
15 were calculated for the unsorted aligned waveforms and plotted in  
16 three-dimensional principal-component space. A group of waveforms were  
17 considered to be generated from one single unit if the waveforms were distinct  
18 from other clusters in the principal-component space and exhibited a refractory  
19 period more than 1 ms. In order to avoid analysis of the same neuron on  
20 different channels, cross-correlation histograms were calculated: if a neuron  
21 showed a peak at the same time as the reference neuron fired, only one of the  
22 two neurons was reserved for further analysis. To quantify the separation

1 between identified neurons, L ratio and Isolation Distance<sup>55</sup> were calculated.  
2 High values of the Isolation Distance and low values of the L ratio indicated  
3 good cluster separation. The L ratio estimates the degree of noise  
4 contamination of one cluster, and a smaller value implied a lower degree of  
5 contamination. The Isolation Distance measured the average distance  
6 expected between a cluster and an equal ensemble of spikes outside the  
7 cluster, and a bigger value indicated a well-isolated cluster. The threshold  
8 values of the L ratio and Isolation Distance were set to 0.2 and 15,  
9 respectively<sup>56</sup>. Units with L ratio higher than 0.2 and Isolation Distance lower  
10 than 15 were excluded from the following analysis. Classification of NAc  
11 neurons were as described in previous studies and two features used for this,  
12 peak-to-peak width and average firing rate, were calculated for each unit<sup>29, 57</sup>.  
13 An unsupervised cluster algorithm based on Ward's method was used to  
14 classify the neurons. Euclidian distance was calculated between neuron pairs  
15 based on the two-dimensional space defined by the two features<sup>58</sup>. To  
16 calculate a neuron's burst number, a burst was defined as comprising at least  
17 three spikes with interspike intervals  $< 9$  ms<sup>59</sup>. Neuron firing rates were  
18 considered as having undergone a statistically significant change if the P-value  
19 of the *ranksum* test was less than 0.05. The multitaper method<sup>60</sup> in the  
20 Chronux analysis package (<http://chronux.org>) was used for power spectra,  
21 time frequency and coherence analysis. The value was calculated using a 1 s  
22 window, 3 time-bandwidth product (NW) and 5 tapers. The coherence value in

1 the theta band (5~9 Hz) that exceeded the 95% confidence level was used for  
2 the analysis. The coherence value was normalized by dividing by the  
3 maximum value in the theta band. The statistical analysis of the coherence  
4 was conducted on the original values.

5

## 6 **Results**

### 7 **Chronic stressors increase functional brain connectivity between the**

#### 8 **BNST and NAc**

9 To gain a circuit-level understanding of anxiety-related behavior, we adopted  
10 a chronic stress model to investigate specific brain regions in the regulation of  
11 avoidance behavior under anxious states.

12 After exposure to chronic stressors (Fig. 1a), mice showed higher anxious  
13 states by markedly avoiding the center in open-field test (OFT) and open-arms  
14 of an elevated plus maze (EPM) when compared to their naive littermates (Fig.  
15 1b-c). Stress related hormones, corticotropin releasing hormone (CRH) and  
16 norepinephrine (NE), were both significantly higher in chronically stressed  
17 mice (Fig. 1d). These data indicate that chronic stressors disrupted normal  
18 anxiety-related behavior and resulted in a maladaptive and excessive  
19 avoidance coping response.

20 We further tested global functional brain connectivity by quantifying the  
21 synchronization of blood oxygen level-dependent (BOLD) fMRI signals across  
22 brain regions in anesthetized naive and chronically stressed mice. The

1   synchronization of BOLD signals in the BNST and NAc was significantly higher  
2   in chronically stressed mice compared to their naive littermates (Fig. 1e-f).  
3   Moreover, functional connectivity was higher in stressed mice compared to  
4   their naive littermates between the basolateral amygdala (BLA) and BNST, and  
5   lower between the periaqueductal gray (PAG) and locus coeruleus (LC) (Fig.  
6   S1a, left and middle), whereas connectivity between NAc and PFC was not  
7   significantly different between groups (Fig. S1a, right). Consistent with the  
8   fMRI synchronization data, fMRI heat maps in coronal sections generated from  
9   stressed mice show a higher correlation of resting-state fMRI BOLD signal  
10  than those generated from their naive littermates, with a seed in NAc across  
11  brain regions (Fig. S1b, top) between BNST and NAc (Fig. S1b, bottom).

12   To quantify long-range functional connectivity, we measured local field  
13  potential (LFP) coherence between the BNST and NAc in awake behaving  
14  stressed and naive mice (Fig. 1g). Compared to naive littermates, the stressed  
15  mice showed higher BNST-NAc coherence in low *gamma*, *alpha* and *beta*  
16  bands, but did not show any significant coherence in *theta* band in these two  
17  structures (Fig. 1h-i). We then analyzed the local *alpha*, *beta*, *gamma* and  
18  *theta* rhythms, respectively, in these two brain regions and found that local  
19  *theta* power was significantly lower in stressed mice compared to their naive  
20  littermates in both structures, whilst there was a trend towards lower *gamma*  
21  power in stressed mice in the BNST (Fig. 1j-k).

22   Since in the cortex and hippocampus, changes either in *theta*<sup>25, 26</sup> or in

1 *gamma* power<sup>27</sup> is due to the PV cell functions, we then investigated PV  
2 neuronal firing features within the BNST-NAc circuit in chronically stressed  
3 mice.

4

#### 5 **Chronically stressed mice have higher sNAc<sup>PV</sup>-neuron firing rates**

6 Next, we looked at the distribution of PV neurons in both the BNST and NAc  
7 and found that PV neurons were expressed predominantly in the NAc shell  
8 (sNAc, Fig. 2a). Consistent with other work<sup>28</sup>, we found no expression of PV  
9 soma in the BNST, only terminal structures (Fig. 2b). To further investigate the  
10 causal relationship of PV neuronal activity and excessive avoidance observed  
11 in stressed mice, we tested sNAc<sup>PV</sup> neuronal firing properties in stressed mice.  
12 We selectively expressed ChR2-mCherry in sNAc<sup>PV</sup> cells of PV-Cre mice to  
13 visualize the PV neurons and recorded their firing patterns in response to  
14 electrical stimulation (Fig. 2c). PV neurons in stressed mice exhibited an  
15 increase in firing frequency in response to injection currents (Fig. 2d-f) without  
16 changes in resting membrane potential (RMP) or threshold (Fig. 2g-h). If  
17 excessive avoidance in stressed mice is due to increased excitability of the  
18 sNAc<sup>PV</sup> neurons, it may be possible to rescue this maladaptive behavior by  
19 inhibiting sNAc<sup>PV</sup> neuronal activity. To test this possibility, we injected  
20 AAV-PV-Cre and either DIO-hM<sub>4</sub>D<sub>i</sub> or DIO-mCherry into the sNAc of stressed  
21 mice (Fig. 2i). Compared to the mCherry group, chemogenetic inhibition of PV  
22 neurons rescued the excessive avoidance effect observed on the open arms of



1 EPM, as seen in both open arm time and entries, which were significantly  
2 higher (Fig. 2j-k). These results imply that hyper-excited sNac<sup>PV</sup> neurons in  
3 stressed mice contributed to their excessive avoidance behavior.

4

5 **PV neurons in sNac represent an anxiety-related signal and impact**  
6 **avoidance coping behavior**

7 We next investigated how NAc neurons are engaged in anxiogenic  
8 information processing under physiological conditions using a combination of  
9 single-unit and photometry recordings in freely-moving mice. These  
10 approaches allowed us to record neuronal firing events in the NAc shell whilst  
11 mice freely explored safe/threatening environments. Ninety-eight well-isolated  
12 NAc units from nine mice during the EPM assay were recorded. Distinct  
13 sub-types of NAc neurons were classified based on their major  
14 electrophysiological properties<sup>29, 30</sup>. Neurons were classified as: 1) putative  
15 fast spiking units (FS) if mean firing rate was more than 15 Hz, the initial slope  
16 of valley decay was greater than 22 mv/ $\mu$ s and the valley half decay time was  
17 less than 250  $\mu$ s; 2) putative non-fast spiking units (Non-FS) if the firing rate  
18 was less than 2 Hz, the initial slope of valley decay was less than 22 mv/ $\mu$ s,  
19 and the valley half decay time was greater than 250  $\mu$ s; 3) others (units that  
20 could not be classified as FS or non-FS) or 4) unclassified, the units could not  
21 be identified as neurons (Fig. 3A). A total of five putative FS neurons (5.1%)  
22 and 28 putative Non-FS neurons (28.6%) were clearly identified (Fig. 3a).

1 These two classes of neurons had significantly different mean firing rates and  
2 burst numbers (Fig. 3b,  $***P < 0.001$ , respectively). Individual FS units showed  
3 a firing preference for the open arms over the closed arms (Fig. 3c). The  
4 z-scores of FS unit firing rates increased when mice entered an open arm (Fig.  
5 3d) and decreased when they moved to closed arms (Fig. S2a). Note that FS  
6 unit firing rates were not influenced by locomotion speed (Fig. 3e). By contrast,  
7 the individual Non-FS units showed no firing preference for either closed or  
8 open arms (Fig. 3f) and none of the z-scores of the firing rates were modulated  
9 by movement over the crossing point in the EPM (Fig. 3g, and see also Fig.  
10 S2b). We further checked the local *theta* power during exploration of either  
11 closed or open arms and found *theta* power was significantly lower during  
12 exploration of open arms compared to closed arms, implying an anxious state  
13 (Fig. S2c). There was no difference in theta power at different locomotion  
14 speeds (Fig. S2d). To show the temporal dynamics of the NAc *theta* oscillation  
15 on the EPM, a mean time-frequency map of mice traversing between arms  
16 was calculated and aligned to entrance time points. The map shows a decline  
17 in mean theta power when mice left the closed arms (Fig. S2e, *left*, indicated  
18 by the black dotted line), which increased when they returned to the closed  
19 arms (Fig. S2e, *right*, indicated by the black dotted line). Finally, to further  
20 address the relationship between local spike activity and neural oscillations,  
21 we calculated the mean spike-field coherence for both FS and Non-FS units.  
22 We found that FS, but not Non-FS, had strong coherence between their spikes

1 and theta oscillations at 4-8 Hz (Fig. S2f,  $**P = 0.007$ ). These results imply that  
2 NAc FS activity was inversely correlated with *theta* power, and that a reduction  
3 of the accumbal *theta* activity reflects a higher stress load during exploration of  
4 the threatening environments, which can promote adaptive avoidance  
5 behavior. These findings are consistent with the above result showing that a  
6 decrease in local *theta* power within either NAc or BNST is reflected by the  
7 anxious state of the stressed mouse (see also Fig. 1j-k).

8 PV neurons are fast spiking neurons<sup>31-33</sup>, and D1, D2-MSNs are the dominant  
9 non-fast spiking cell types in the NAc<sup>34</sup>. We next used *in vivo* calcium signal  
10 recordings in three different strains of transgenic mice to confirm the impact of  
11 these different neuron types on anxiogenic information processing (Fig. 3h).

12 We first performed Immunostaining and *in situ* hybridization and confirmed the  
13 specific expression of GCaMP6<sub>m</sub> in PV, D1R or D2R cells respectively (Fig.  
14 S3a-c). Ca<sup>2+</sup> signals were then recorded as mice moved from the closed to  
15 open arms (Fig. 3i, inset). PV neurons within sNAc were activated when mice  
16 approached the boundary between the closed and open arms and Ca<sup>2+</sup> signal  
17 increased significantly during exploration of the open arms (Fig. 3i); D1 MSNs  
18 exhibited no preference for either closed or open arms (Fig. 3j) whereas D2  
19 MSNs showed a slightly different firing preference for the open arms to the  
20 closed ones (Fig. 3k). Recording traces from the different populations of NAc  
21 neurons were used to generate z-scores of calcium signal change and we  
22 found that PV and D2 neurons were active when mice were in the open arms

1 but not the closed arms (Fig. 3l); however, the onset of D2 neuronal firing  
2 occurred later than the PV neurons during exploration of the open arms (Fig.  
3 3m). This neural activity in the open arms may reflect that PV neurons in the  
4 NAc represent the association between anxiety-related information and the  
5 initiation of avoidance coping behavior. In addition, we found a well negative  
6 correlation between the PV firing rates and time of open-arm exploration (Fig.  
7 3n), which suggests that accumbal PV neuronal activation plays a role in  
8 avoidance of anxiogenic locations. Calcium transients for from these cell  
9 populations in a negative control group are seen in Fig. S3d-f where no  
10 differences were found between open and closed arms.

11

### 12 **Activation of PV neurons in NAc shell is required for avoidance coping** 13 **responses to anxiogenic stimuli**

14 A combination of PV-Cre mice, conditional ChR2 viral expression, and  
15 optogenetic manipulation was used to test the impact of accumbal PV  
16 neuronal activity on avoidance behavior induced by an anxiogenic context.  
17 Because fast-firing PV cells can generate high-frequency trains with maximal  
18 frequencies greater than 100 Hz, and above 60-80 Hz the slope of  
19 frequency-interval (f-I) curve is well-approximated by linearization<sup>35</sup>, we used a  
20 photostimulation rate of 60 Hz for the optrode placed in the NAc shell (Fig. 4a,  
21 *left*); this is approximately the average firing rate of FS units in the open arms  
22 (see also Fig. 3c). Immunostaining results indicated that the majority of

1 ChR2-mCherry labeled neurons expressed PV (Fig. 4a, *right*). We confirmed  
2 that opto-tagged PV<sup>+</sup> cells, recorded from patch-clamp experiments in the acute  
3 brain slices, were steadily activated by 5-80 Hz light stimulation at 470 nm (Fig.  
4 4b). Selective light stimulation of these PV neurons in the NAc during the EPM  
5 task led to more avoidance behavior in PV-ChR2 mice compared to  
6 PV-mCherry controls, illustrated by a significantly lower number of entries and  
7 markedly less time spent in the anxiogenic open arms compared (Fig. 4c-d).  
8 The OFT led to similar results: light stimulation of PV neurons in PV-ChR2  
9 mice led to less exploration time in the center of the open-field apparatus  
10 compared to the PV-mCherry control mice (Fig. 4e) without any difference in  
11 locomotion between the two groups during each five-min epoch (Fig. 4f).

12 In order to further determine the causal role of accumbal PV activity in  
13 avoidance behavior related to anxiety states, we expressed hM<sub>4</sub>D<sub>i</sub> in PV  
14 neurons by bilateral injection of Cre-dependent AAV-DIO-hM<sub>4</sub>D<sub>i</sub>-mCherry into  
15 the NAc shell of PV-Cre mice. Mice were given a 10-min OFT followed by a  
16 5-min EPM test (Fig. 4g). Co-localization of the majority PV cells with hM<sub>4</sub>D<sub>i</sub>  
17 was verified by immunostaining (Fig. 4h). Representative OFT and EPM heat  
18 maps for both PV/mCherry (control) and PV/hM<sub>4</sub>D<sub>i</sub> groups are shown in Fig.  
19 4i-k: hM<sub>4</sub>D<sub>i</sub> mice showed significantly greater center exploration, relative to  
20 mCherry controls. Consistent with the OFT findings, hM<sub>4</sub>D<sub>i</sub> mice showed  
21 greater exploration of the open arms compared to the control mice, reflecting  
22 an inappropriate avoidance coping behavior (Fig. 4l-n).

1 Taken together, these data suggest that activity of PV neurons within the NAc  
2 is required for execution of appropriate avoidance behavior to buffer the stress  
3 response evoked by anxiogenic environments.

4

5 **Inputs to NAc<sup>PV</sup> neurons originate predominantly from the anterior dorsal**

6 **BNST (adBNST)**

7 We next investigated whether the BNST was upstream of the NAc<sup>PV</sup> neurons  
8 and if it is the region where anxiety-related avoidance coping behavior is  
9 integrated. Cre-dependent, rabies-virus-based whole brain monosynaptic  
10 tracing was performed to analyze upstream regions that innervate NAc<sup>PV</sup>  
11 neurons. We injected PV-Cre mice with Cre-dependent AAVs expressing the  
12 avian EnvA receptor (TVA) and rabies virus envelope glycoprotein (RG) in  
13 combination with the  $\Delta$ G-dsRed (EnvA) rabies virus (RV) (Fig. 5a). We found  
14 that a Cre-dependent helper virus combined with RV expressing dsRed  
15 labeled 84% of NAc PV neurons (GFP<sup>+</sup> cells, Fig. 5b). Our results showed that  
16 the dominant inputs to NAc<sup>PV</sup> neurons were from the anterior dorsal part of the  
17 nucleus of the stria terminalis (adBNST) (52%, Fig. 5c, d), a classic GABAergic  
18 anxiety-associated region. Other brain regions that provided inputs to NAc<sup>PV</sup>  
19 neurons included the basolateral amygdala (BLA, 4.34%), central amygdala  
20 (CeA, 10.27%), media prefrontal cortex (mPFC, 5.7%) as well as the ventral  
21 tegmental area (VTA, 6.07%). NAc<sup>PV</sup> neurons also received monosynaptic  
22 inputs from reward-associated components, such as the paraventricular

1 thalamus (PVT, 19.6%) and lateral hypothalamus (LH, 16.07%)<sup>36</sup>; no  
2 projections from the Hippocampus (Hippo, 0%) were found (Fig. 5c, d). *In situ*  
3 hybridization experiments demonstrated the co-expression of Gad 1/2 and  
4 dsRed in aBNST (96.1%, Fig. 5e, f). These findings indicate that NAc<sup>PV</sup>  
5 neurons were modulated under a GABAergic network. No RV expressing  
6 dsRed labeled cells were found in the above brain regions (Fig. S4). We tested  
7 further and found no other neuronal markers in the BNST except sparse CRH  
8 co-expressed with RV signals in adBNST (Fig. S5).

9

10 **Optogenetic activation of adBNST GABAergic terminals in sNac**  
11 **produces an anxiolytic effect *via* NAc<sup>PV</sup> neurons**

12 Next, we investigated the impact of the connection between the adBNST  
13 GABAergic neurons and NAc<sup>PV</sup> cells on producing anxiety-related behavior.  
14 We virally expressed GAD67-Cre and Cre-dependent channelrhodopsin-2  
15 (ChR2) in adBNST GABAergic neurons and visualized NAc<sup>PV</sup> neurons by  
16 injection of adeno-associated viruses (AAVs) encoding the fluorophore  
17 mCherry into PV-Cre mice (Fig. 6a). Co-staining results revealed that the  
18 majority of neurons expressing GAD<sup>+</sup> also co-expressed ChR2 (Fig. 6b-c). We  
19 recorded evoked IPSPs from PV neurons within the NAc shell by illumination  
20 of adBNST afferent axon fibers, which was completely blocked by 20  $\mu$ M  
21 bicuculline, implying a GABAergic monosynaptic input to the NAc PV neurons  
22 (Fig. 6d-e). The mean latency was  $4.07 \pm 0.7$  ms, in line with monosynaptic

1 transmission (Fig. 6f, right). These data suggest a direct functional GABAergic  
2 input to the sNac<sup>PV</sup> neurons. We further targeted the function of this  
3 GABAergic input to the NAc<sup>PV</sup> neurons by virally expressing Cre-dependent  
4 ChR2 and GAD67-Cre in adBNST neurons followed by light stimulation of the  
5 terminals within sNac (Fig. 6g). Blue light stimulation resulted in decreased  
6 avoidance of both EPM open arms and OFT center area (Fig. 6i). We then  
7 tested whether, under similar conditions, we would obtain similar results  
8 without adBNST neurons innervating NAc<sup>PV</sup>. AAV2/9-FLEX-taCasp3-TEVp  
9 and PV-Cre viruses were injected into the sNac to selectively kill PV<sup>+</sup> neurons;  
10 Cre-dependent ChR2 and GAD67-Cre were both injected into the adBNST of  
11 mice to specifically activate this new BNST-NAc GABAergic circuit (Fig. 6k);  
12 immunostaining confirmed that most of the PV<sup>+</sup> neurons were killed by  
13 taCasp3 compared with the control virus (Fig. 6l). Terminals in the NAc shell  
14 were stimulated once again and we found that reduced avoidance of EPM  
15 open arms and OFT center was now effectively blocked during the light ON  
16 phase (Fig. 6m-n). These findings suggest a crucial role of adBNST  
17 GABAergic inputs to the NAc<sup>PV</sup> neurons in distinguishing safety and risk to  
18 facilitate avoidance of anxiogenic locations. To examine the presynaptic effect  
19 of GABA release on the NAc<sup>PV</sup> neurons, we recorded two consecutive eIPSPs,  
20 which were separated by varying interspike intervals to calculate the  
21 paired-pulse ratio (PPR), upon light stimulation of the adBNST GABAergic  
22 afferents to sNac. We found that the PPR was significantly increased in



1 stressed mice compared to naive ones at both 50- and 100-ms interstimulation  
2 interval (Fig. 6p-q). This increased PPR in stressed mice suggests an impaired  
3 presynaptic GABA release at adBNST to sNac synapses, further indicating  
4 these sNac PV neurons are disinhibited by GABAergic inputs from the  
5 adBNST under a chronic stress state.

6 Based on these findings, we then tested whether activation of the adBNST  
7 GABAergic afferents to sNac<sup>PV</sup> could rescue the pathological anxiety-related  
8 behavior in stressed mice. We injected AAV-GAD67-Cre and either DIO-ChR2  
9 or DIO-mCherry into the adBNST of stressed PV-Cre mice and implanted an  
10 optical fiber above the sNac (Fig. 6r). Light stimulation of adBNST GABAergic  
11 afferents in sNac significantly increased the time spent in the OFT center and  
12 open arms of the EPM (Fig. 6s-t), which implies that excessive avoidance  
13 behavior related to anxious state was rescued. Taken together, these findings  
14 indicate that in anxious states, the adBNST may send a disinhibition input to  
15 the sNac<sup>PV</sup>, leading to excessive avoidance of the threatening locations.

16

17

18

## 1 Discussion

2 Chronic stress leads to long-term changes in brain structure and function,  
3 which increases the incidence of stress-related disorders, such as anxiety<sup>4</sup>.  
4 Anxiety disorders are the most prevalent mental disorders and are associated  
5 with immense social health care costs<sup>21</sup>. A central symptom is avoidance  
6 behavior, which also acts as a reinforcer of the anxious state<sup>24, 38</sup>. It is vital then  
7 to understand the underlying cellular and circuitry mechanisms underpinning  
8 this type of avoidance behavior, which could result in new methods to break  
9 the cycle of anxiety-avoidance.

10 A critical role in stress response and anxiety has been attributed to the BNST  
11 in both rodent and human studies<sup>3, 39, 40</sup>. The NAc is a key component of the  
12 brain “reward” circuits<sup>41-43</sup> in emotional and motivated actions and its  
13 dysfunction has been strongly implicated in emotional disorders<sup>44, 45</sup>,  
14 especially in exerting a dominant influence on anxiety<sup>10, 46, 47</sup>. Although one  
15 study noted a projection from BNST to NAc<sup>11</sup>, knowledge about the function of  
16 the link between the stress response neurocircuitry and reward circuitry not  
17 known.

18 Our resting fMRI findings indicate that besides the high correlation among the  
19 stress response regions (Fig. S1a), increased connectivity was observed  
20 between BNST and NAc under a chronic-stress-induced anxious state (Fig.  
21 1e-f); the LFP coherences in *alpha*, *beta* and *gamma* bands between these  
22 two regions were also significantly increased (Fig. 1i), confirming an intrinsic

1 link between the stress response region and the reward circuit component  
2 under anxious state. We can envision that the increased synchronization of  
3 BOLD signals in BNST and NAc may potentially be used as an imaging marker  
4 for the diagnosis of anxiety disorders in the future.

5 LFP recordings further showed a marked decrease in the local *theta* power  
6 both in the NAc and BNST of stressed mice (Fig. 1j-k), indicating PV cell  
7 involvement within these two regions as previous studies have suggested a  
8 correlation between PV activity and local *theta* changes<sup>25, 26</sup>. However, only the  
9 NAc shell contained PV cell bodies (Fig. 2a) and the patch-clamp data found  
10 that these accumbal PV cells were hyper-excitabile under an anxious state (Fig.  
11 2d-e), confirming the surprising role of accumbal PV interneurons in behavior  
12 related to anxiety, given their low occurrence in the region. According to a  
13 previous report, the anxious state is reflected by the reversed correlation  
14 between the neuronal activities and open arm exploration time<sup>48</sup>, we therefore  
15 performed *in vivo* calcium signal recordings, and further confirmed that  
16 activation of accumbal PV neurons is well correlated to avoidance of  
17 anxiogenic EPM open arms (Fig. 3n).

18 Indeed, other observations in our present study also support this hypothesis.  
19 First, we used *in vivo* single-unit recordings to confirm the relationship between  
20 anxiogenic stimuli and the activity of accumbal PV neurons. Among our  
21 recorded neurons, a type of fast spiking (FS) unit showed preferential activity  
22 in the anxiety-inducing environment (open arms, Fig. 3c-d, Fig. S2a). Because

1 most fast-spiking neurons within the NAc have previously been identified as  
2 PV neurons, it confirms that accumbal PV neurons were engaged in the  
3 anxiogenic-related behavior. Second, our results (Fig. 3k) were consistent with  
4 a recent study showing that excitation of D2R cells in the NAc was necessary  
5 for normal, innate risk-avoidance<sup>16</sup>; however, we further demonstrated that PV  
6 neurons fired earlier than D2R cells (Fig. 3l-m), which implies that the  
7 accumbal PV neurons are informed of the risk and then modulate the activity of  
8 nearby cells that, in turn, initiate avoidance coping behavior. Further study is  
9 needed to investigate the accumbal neuronal firing dynamics in orchestrating  
10 risk avoidance in response to anxiogenic stimuli. Third, *in vivo* genetic  
11 manipulation of PV-neuronal activity in both healthy and chronic stress models  
12 further highlighted their importance in encoding anxiety-related behavior (Fig.  
13 2i-k and Fig. 4). Taken together, these findings significantly extend previous  
14 observations of NAc in anxiety-related information processing; this is the first  
15 study that has begun to reveal real-time PV activity in the accumbens during  
16 the encoding of anxiety-related behavior in free exploration of aversive spaces  
17 without prior training and suggests that the underlying neuronal mechanism  
18 has been evolutionarily programmed.

19 Previous studies have showed that the NAc receives intermingled  
20 glutamatergic and dopaminergic inputs from a variety of forebrain regions,  
21 including the amygdala<sup>23</sup>, hippocampus<sup>22</sup>, thalamus<sup>21, 33</sup>, ventral tegmental  
22 area<sup>19</sup> and the prefrontal cortex<sup>34</sup>. Using Cre-dependent, rabies-virus-based

1 whole brain monosynaptic tracing strategy and electrophysiological recordings  
2 from brain slices, we demonstrated that NAc PV cells were specifically  
3 innervated by the GABAergic afferents stemming from the adBNST (Fig. 5 and  
4 Fig. 6d). To our best knowledge, this is the first study to map novel neural  
5 circuitry specifically innervating NAc PV neurons. Although a recent study  
6 found that light-evoked activation of vHPC inputs to NAc resulted in NAc<sup>PV</sup> cell  
7 regulation of cocaine-seeking behavior, a cell-specific monosynaptic tracing  
8 strategy was not used in their study to show the anatomic connection<sup>22</sup>.  
9 Therefore, we speculate that the PV response to vHPC afferent activation may  
10 be indirect.

11 A previous study has shown that anterior BNST-associated activity exerts  
12 anxiolytic influence on anxious states<sup>49</sup>. Several of our current findings are  
13 consistent with this conclusion: specific activation of these afferents from the  
14 adBNST resulted in a robust inhibition of accumbal PV activity (Fig. 6d) and  
15 reduced avoidance coping behavior in response to anxiogenic stimuli (Fig. 6i-j);  
16 when PV function was ablated, the previously observed reduced avoidance  
17 behavior was also abolished (Fig. 6k-n); PPR has been reported to reflect the  
18 state of presynaptic input at synapses<sup>50</sup>. In our chronic stress model, we found  
19 in the adBNST-- sNAc circuit, there was an increase in the PPR, which  
20 indicating that an impaired release of GABA onto sNAc<sup>PV</sup> cells upon light  
21 activation of these GABAergic terminals in the sNAc (Fig. 6o-q); meanwhile,  
22 elevating the activity of GABAergic inputs to the NAc<sup>PV</sup> neurons rescued

1 anxiety-related excessive avoidance behavior, representing an anxiolytic effect  
2 (Fig. 6r-t). Combine these findings, we summarised that adBNST sends  
3 GABAergic inputs to sNac to control avoidance behaviour, which is mediated  
4 by sNac<sup>PV</sup> neurons.

5 PV activity has been implicated in contributing to the *theta* rhythms in the  
6 mPFC and hippocampus<sup>25, 26</sup> and our results also showed a marked decrease  
7 in *theta* rhythm on stressed mice both in NAc and BNST (Fig. 1j-k); additionally,  
8 electrophysiological recordings from freely-moving mice confirmed  
9 consistently lower local *theta* power in healthy animals during exploring the  
10 anxiogenic open arms (unrelated to locomotion, Fig. S2c-e), suggesting a  
11 strong correlation between *theta* power changes and anxious states. We  
12 reason that accumbal PV neurons exhibited high excitability under anxious  
13 states and therefore, highly activated PV cells contribute to *theta* oscillations  
14 changes either in BNST or NAc. Further study is needed to determine whether  
15 PV neuronal activation in the accumbens is the main driver for the decrease in  
16 *theta* oscillation within these two structures (Fig. 1j-k), although in the present  
17 study the increase in the coherence between FS spikes and LFP in *theta* range  
18 does suggest that this may be the case (Fig. S2f).

19 In conclusion, our results provide strong evidence for accumbal PV neurons  
20 driving anxiety-related avoidance coping behavior and may provide a new  
21 basis for the therapeutic purpose of pathological anxiety. Despite being a  
22 relative minor (~4%) component of all NAc neurons<sup>22</sup>, this population has a

1 robust anxiety-related behavioral effect. These accumbal PV cells are  
2 innervated by a long GABAergic-projecting input stemming from the adBNST.  
3 Anxiety represents a brain state: our study uncovered a new circuit mechanism,  
4 precisely defined by the neuronal types involved, by which the stress response  
5 brain region orchestrates the reward circuit component to exert direct effects  
6 on anxious states. Our findings may help to explain why anxiety and addiction  
7 are highly comorbid, although these two common psychiatric disorders engage  
8 emotion and reward circuits, respectively.

## 1 **Acknowledgements**

2 This work was funded by the National Natural Science Foundation of China  
3 (31671116 J.T., 31761163005 J.T., 31800881 L.W. and 91132306 L.W.), the  
4 National Science Fund for Distinguished Young Scholars of NSFC (81425010  
5 L.W.), the International Big Science Program Cultivating Project of CAS  
6 (172644KYS820170004 L.W.), the National Basic Research Program of China  
7 (973 program: 2015CB856402 J.T.), the External Cooperation Program of the  
8 Chinese Academy of Sciences (172644KYSB20160057 J.T.), the Youth  
9 Innovation Promotion Association of the Chinese Academy of Sciences  
10 (2017413 P.W.), the Guangdong Provincial Key S&T Program  
11 (2018B030336001 J.T.), Shenzhen Government Basic Research Grants  
12 (JCYJ20160429190927063 J.T., JCYJ20170413164535041 L.W.), Shenzhen  
13 Discipline Construction Project for Neurobiology DRCSM [2016]1379 (L.W.).

14 We are gratefully for the comments and advice on the manuscript given by  
15 Prof. Liqun Luo. We thank Prof. Zilong Qiu for PV-Cre, D1R-Cre and D2R-Cre  
16 mice. We also thank Mr. Xu ZB and Mr. Liu BF for their help in transgenic mice  
17 husbandry and phenotyping. We are grateful to Mr. Liu XL and Ms. Li NN for  
18 their help in virus packaging.

19

## 20 **Author contributions**

21 J.T. and L.W. conceived of this study. Q.X., X-Y.Z., L.X., B-F.W., and A-L. C.  
22 performed experiments. J.T., Q. X., X-Y. Z., P-F.W., Y-N.H., A-L. C. and J.W.



1 analyzed data. Y.L. and F-Q.X. helped to design the experiments and provided

2 suggestions. J.T. and Q.X. wrote the manuscript.

3

4 **Conflict of Interest**

5 The authors have declared that no conflict of interest exists.

6

## 1 Reference

- 2 1. Bondi CO, Rodriguez G, Gould GG, Frazer A, Morilak DA. Chronic unpredictable stress  
3 induces a cognitive deficit and anxiety-like behavior in rats that is prevented by chronic  
4 antidepressant drug treatment. *Neuropsychopharmacology : official publication of the*  
5 *American College of Neuropsychopharmacology* 2008; **33**(2): 320-331.  
6
- 7 2. Abush H, Akirav I. Cannabinoids ameliorate impairments induced by chronic stress to  
8 synaptic plasticity and short-term memory. *Neuropsychopharmacology : official publication of*  
9 *the American College of Neuropsychopharmacology* 2013; **38**(8): 1521-1534.  
10
- 11 3. Davis M, Walker DL, Miles L, Grillon C. Phasic vs sustained fear in rats and humans: role of  
12 the extended amygdala in fear vs anxiety. *Neuropsychopharmacology : official publication of*  
13 *the American College of Neuropsychopharmacology* 2010; **35**(1): 105-135.  
14
- 15 4. Avery SN, Clauss JA, Blackford JU. The Human BNST: Functional Role in Anxiety and  
16 Addiction. *Neuropsychopharmacology : official publication of the American College of*  
17 *Neuropsychopharmacology* 2016; **41**(1): 126-141.  
18
- 19 5. Carelli RM. The nucleus accumbens and reward: neurophysiological investigations in  
20 behaving animals. *Behavioral and cognitive neuroscience reviews* 2002; **1**(4): 281-296.  
21
- 22 6. Richard JM, Castro DC, Difeliceantonio AG, Robinson MJ, Berridge KC. Mapping brain  
23 circuits of reward and motivation: in the footsteps of Ann Kelley. *Neuroscience and*  
24 *biobehavioral reviews* 2013; **37**(9 Pt A): 1919-1931.  
25
- 26 7. Berridge KC, Robinson TE, Aldridge JW. Dissecting components of reward: 'liking', 'wanting',  
27 and learning. *Current opinion in pharmacology* 2009; **9**(1): 65-73.  
28
- 29 8. Robinson MJ, Berridge KC. Instant transformation of learned repulsion into motivational  
30 "wanting". *Current biology : CB* 2013; **23**(4): 282-289.  
31
- 32 9. Vialou V, Thibault M, Kaska S, Cooper S, Gajewski P, Eagle A *et al.* Differential induction of  
33 FosB isoforms throughout the brain by fluoxetine and chronic stress. *Neuropharmacology*  
34 2015; **99**: 28-37.  
35
- 36 10. Bewernick BH, Hurlemann R, Matusch A, Kayser S, Grubert C, Hadrysiewicz B *et al.*  
37 Nucleus accumbens deep brain stimulation decreases ratings of depression and anxiety in  
38 treatment-resistant depression. *Biol Psychiatry* 2010; **67**(2): 110-116.  
39
- 40 11. Dong HW, Swanson LW. Organization of axonal projections from the anterolateral area of the  
41 bed nuclei of the stria terminalis. *The Journal of comparative neurology* 2004; **468**(2):  
42 277-298.  
43
- 44 12. Partridge JG, Forcelli PA, Luo R, Cashdan JM, Schulkin J, Valentino RJ *et al.* Stress increases

- 1 GABAergic neurotransmission in CRF neurons of the central amygdala and bed nucleus stria  
2 terminalis. *Neuropharmacology* 2016; **107**: 239-250.
- 3
- 4 13. Gungor NZ, Yamamoto R, Pare D. Glutamatergic and gabaergic ventral BNST neurons differ  
5 in their physiological properties and responsiveness to noradrenaline.  
6 *Neuropsychopharmacology : official publication of the American College of*  
7 *Neuropsychopharmacology* 2018; **43**(10): 2126-2133.
- 8
- 9 14. Yang H, de Jong JW, Tak Y, Peck J, Bateup HS, Lammel S. Nucleus Accumbens Subnuclei  
10 Regulate Motivated Behavior via Direct Inhibition and Disinhibition of VTA Dopamine  
11 Subpopulations. *Neuron* 2018; **97**(2): 434-449 e434.
- 12
- 13 15. Koo JW, Lobo MK, Chaudhury D, Labonte B, Friedman A, Heller E *et al.* Loss of BDNF  
14 signaling in D1R-expressing NAc neurons enhances morphine reward by reducing GABA  
15 inhibition. *Neuropsychopharmacology : official publication of the American College of*  
16 *Neuropsychopharmacology* 2014; **39**(11): 2646-2653.
- 17
- 18 16. Blomeley C, Garau C, Burdakov D. Accumbal D2 cells orchestrate innate risk-avoidance  
19 according to orexin signals. *Nature neuroscience* 2018; **21**(1): 29-32.
- 20
- 21 17. Sim HR, Choi TY, Lee HJ, Kang EY, Yoon S, Han PL *et al.* Role of dopamine D2 receptors in  
22 plasticity of stress-induced addictive behaviours. *Nature communications* 2013; **4**: 1579.
- 23
- 24 18. Gallo EF, Meszaros J, Sherman JD, Chohan MO, Teboul E, Choi CS *et al.* Accumbens  
25 dopamine D2 receptors increase motivation by decreasing inhibitory transmission to the  
26 ventral pallidum. *Nature communications* 2018; **9**(1): 1086.
- 27
- 28 19. Qi J, Zhang S, Wang HL, Barker DJ, Miranda-Barrientos J, Morales M. VTA glutamatergic  
29 inputs to nucleus accumbens drive aversion by acting on GABAergic interneurons. *Nature*  
30 *neuroscience* 2016; **19**(5): 725-733.
- 31
- 32 20. Kita H, Kosaka T, Heizmann CW. Parvalbumin-immunoreactive neurons in the rat  
33 neostriatum: a light and electron microscopic study. *Brain Res* 1990; **536**(1-2): 1-15.
- 34
- 35 21. Gross C, Hen R. The developmental origins of anxiety. *Nat Rev Neurosci* 2004; **5**(7): 545-552.
- 36
- 37 22. Gritton HJ, Howe WM, Romano MF, DiFeliceantonio AG, Kramer MA, Saligrama V *et al.*  
38 Unique contributions of parvalbumin and cholinergic interneurons in organizing striatal  
39 networks during movement. *Nature neuroscience* 2019.
- 40
- 41 23. Li H, Penzo MA, Taniguchi H, Kopec CD, Huang ZJ, Li B. Experience-dependent  
42 modification of a central amygdala fear circuit. *Nature neuroscience* 2013; **16**(3): 332-339.
- 43
- 44 24. Riordan DM, Singhal D. Anxiety-related disorders: An overview. *J Paediatr Child Health*

- 1           2018; **54**(10): 1104-1109.
- 2
- 3   25.    Buzsaki G. Theta oscillations in the hippocampus. *Neuron* 2002; **33**(3): 325-340.
- 4
- 5   26.    Amilhon B, Huh CY, Manseau F, Ducharme G, Nichol H, Adamantidis A *et al.* Parvalbumin  
6    Interneurons of Hippocampus Tune Population Activity at Theta Frequency. *Neuron* 2015;  
7    **86**(5): 1277-1289.
- 8
- 9   27.    Sohal VS, Zhang F, Yizhar O, Deisseroth K. Parvalbumin neurons and gamma rhythms  
10    enhance cortical circuit performance. *Nature* 2009; **459**(7247): 698-702.
- 11
- 12   28.    Nguyen AQ, Dela Cruz JA, Sun Y, Holmes TC, Xu X. Genetic cell targeting uncovers specific  
13    neuronal types and distinct subregions in the bed nucleus of the stria terminalis. *The Journal*  
14    *of comparative neurology* 2016; **524**(12): 2379-2399.
- 15
- 16   29.    Berke JD, Okatan M, Skurski J, Eichenbaum HB. Oscillatory entrainment of striatal neurons  
17    in freely moving rats. *Neuron* 2004; **43**(6): 883-896.
- 18
- 19   30.    Matsumoto J, Urakawa S, Hori E, de Araujo MF, Sakuma Y, Ono T *et al.* Neuronal responses  
20    in the nucleus accumbens shell during sexual behavior in male rats. *J Neurosci* 2012; **32**(5):  
21    1672-1686.
- 22
- 23   31.    Todtenkopf MS, Stellar JR, Williams EA, Zahm DS. Differential distribution of parvalbumin  
24    immunoreactive neurons in the striatum of cocaine sensitized rats. *Neuroscience* 2004; **127**(1):  
25    35-42.
- 26
- 27   32.    Favero M, Sotuyo NP, Lopez E, Kearney JA, Goldberg EM. A Transient Developmental  
28    Window of Fast-Spiking Interneuron Dysfunction in a Mouse Model of Dravet Syndrome. *J*  
29    *Neurosci* 2018; **38**(36): 7912-7927.
- 30
- 31   33.    Hu H, Gan J, Jonas P. Interneurons. Fast-spiking, parvalbumin(+) GABAergic interneurons:  
32    from cellular design to microcircuit function. *Science* 2014; **345**(6196): 1255-1263.
- 33
- 34   34.    Renteria R, Maier EY, Buske TR, Morrisett RA. Selective alterations of NMDAR function and  
35    plasticity in D1 and D2 medium spiny neurons in the nucleus accumbens shell following  
36    chronic intermittent ethanol exposure. *Neuropharmacology* 2017; **112**(Pt A): 164-171.
- 37
- 38   35.    Ferguson KA, Huh CY, Amilhon B, Williams S, Skinner FK. Experimentally constrained CA1  
39    fast-firing parvalbumin-positive interneuron network models exhibit sharp transitions into  
40    coherent high frequency rhythms. *Front Comput Neurosci* 2013; **7**: 144.
- 41
- 42   36.    Tyree SM, de Lecea L. Lateral Hypothalamic Control of the Ventral Tegmental Area: Reward  
43    Evaluation and the Driving of Motivated Behavior. *Front Syst Neurosci* 2017; **11**: 50.
- 44

- 1 37. Menegas W, Akiti K, Amo R, Uchida N, Watabe-Uchida M. Dopamine neurons projecting to  
2 the posterior striatum reinforce avoidance of threatening stimuli. *Nature neuroscience* 2018;  
3 **21**(10): 1421-1430.  
4
- 5 38. Kim T, Thankachan S, McKenna JT, McNally JM, Yang C, Choi JH *et al.* Cortically  
6 projecting basal forebrain parvalbumin neurons regulate cortical gamma band oscillations.  
7 *Proc Natl Acad Sci U S A* 2015; **112**(11): 3535-3540.  
8
- 9 39. Alvarez RP, Chen G, Bodurka J, Kaplan R, Grillon C. Phasic and sustained fear in humans  
10 elicits distinct patterns of brain activity. *NeuroImage* 2011; **55**(1): 389-400.  
11
- 12 40. Sink KS, Chung A, Ressler KJ, Davis M, Walker DL. Anxiogenic effects of CGRP within the  
13 BNST may be mediated by CRF acting at BNST CRFR1 receptors. *Behavioural brain*  
14 *research* 2013; **243**: 286-293.  
15
- 16 41. Kelley AE, Berridge KC. The neuroscience of natural rewards: relevance to addictive drugs. *J*  
17 *Neurosci* 2002; **22**(9): 3306-3311.  
18
- 19 42. Volkow ND, Wang GJ, Baler RD. Reward, dopamine and the control of food intake:  
20 implications for obesity. *Trends Cogn Sci* 2011; **15**(1): 37-46.  
21
- 22 43. Walker DL, Toufexis DJ, Davis M. Role of the bed nucleus of the stria terminalis versus the  
23 amygdala in fear, stress, and anxiety. *European journal of pharmacology* 2003; **463**(1-3):  
24 199-216.  
25
- 26 44. Russo SJ, Nestler EJ. The brain reward circuitry in mood disorders. *Nature Reviews*  
27 *Neuroscience* 2013; **14**(9): 609-625.  
28
- 29 45. Stachniak TJ, Ghosh A, Sternson SM. Chemogenetic synaptic silencing of neural circuits  
30 localizes a hypothalamus-->midbrain pathway for feeding behavior. *Neuron* 2014; **82**(4):  
31 797-808.  
32
- 33 46. Levita L, Hoskin R, Champi S. Avoidance of harm and anxiety: a role for the nucleus  
34 accumbens. *Neuroimage* 2012; **62**(1): 189-198.  
35
- 36 47. Lopes AP, da Cunha IC, Steffens SM, Ferraz A, Vargas JC, de Lima TC *et al.* GABAA and  
37 GABAB agonist microinjections into medial accumbens shell increase feeding and induce  
38 anxiolysis in an animal model of anxiety. *Behav Brain Res* 2007; **184**(2): 142-149.  
39
- 40 48. Jimenez JC, Su K, Goldberg AR, Luna VM, Biane JS, Ordek G *et al.* Anxiety Cells in a  
41 Hippocampal-Hypothalamic Circuit. *Neuron* 2018; **97**(3): 670-683 e676.  
42
- 43 49. Kim SY, Adhikari A, Lee SY, Marshel JH, Kim CK, Mallory CS *et al.* Diverging neural  
44 pathways assemble a behavioural state from separable features in anxiety. *Nature* 2013;

- 1           **496**(7444): 219-223.  
2  
3   50.    Li Y, Li CY, Xi W, Jin S, Wu ZH, Jiang P *et al.* Rostral and Caudal Ventral Tegmental Area  
4           GABAergic Inputs to Different Dorsal Raphe Neurons Participate in Opioid Dependence.  
5           *Neuron* 2019; **101**(4): 748-761 e745.  
6  
7   51.    Moreau JL, Borgulya J, Jenck F, Martin JR. Tolcapone: a potential new antidepressant  
8           detected in a novel animal model of depression. *Behav Pharmacol* 1994; **5**(3): 344-350.  
9  
10   52.    Sanna MD, Quattrone A, Galeotti N. Antidepressant-like actions by silencing of neuronal  
11           ELAV-like RNA-binding proteins HuB and HuC in a model of depression in male mice.  
12           *Neuropharmacology* 2018; **135**: 444-454.  
13  
14   53.    Adhikari A, Topiwala MA, Gordon JA. Single units in the medial prefrontal cortex with  
15           anxiety-related firing patterns are preferentially influenced by ventral hippocampal activity.  
16           *Neuron* 2011; **71**(5): 898-910.  
17  
18   54.    Tsai HC, Zhang F, Adamantidis A, Stuber GD, Bonci A, de Lecea L *et al.* Phasic firing in  
19           dopaminergic neurons is sufficient for behavioral conditioning. *Science* 2009; **324**(5930):  
20           1080-1084.  
21  
22   55.    Schmitzer-Torbert N, Jackson J, Henze D, Harris K, Redish AD. Quantitative measures of  
23           cluster quality for use in extracellular recordings. *Neuroscience* 2005; **131**(1): 1-11.  
24  
25   56.    Kvitsiani D, Ranade S, Hangya B, Taniguchi H, Huang JZ, Kepecs A. Distinct behavioural  
26           and network correlates of two interneuron types in prefrontal cortex. *Nature* 2013; **498**(7454):  
27           363-366.  
28  
29   57.    Bartho P, Hirase H, Monconduit L, Zugaro M, Harris KD, Buzsaki G. Characterization of  
30           neocortical principal cells and interneurons by network interactions and extracellular features.  
31           *J Neurophysiol* 2004; **92**(1): 600-608.  
32  
33   58.    Courtin J, Chaudun F, Rozeske RR, Karalis N, Gonzalez-Campo C, Wurtz H *et al.* Prefrontal  
34           parvalbumin interneurons shape neuronal activity to drive fear expression. *Nature* 2014;  
35           **505**(7481): 92-96.  
36  
37   59.    Royer S, Zemelman BV, Losonczy A, Kim J, Chance F, Magee JC *et al.* Control of timing,  
38           rate and bursts of hippocampal place cells by dendritic and somatic inhibition. *Nature*  
39           *neuroscience* 2012; **15**(5): 769-775.  
40  
41   60.    Cold CSHPM, Cold CSHHB. *Observed brain dynamics*. Oxford University Press 2007.  
42  
43

## 1 **Figure Legends**

2

### 3 **Fig 1. Chronically stressed mice exhibited increased functional brain connectivity in the**

#### 4 **BNST and NAc**

5 (a) Protocol used for unpredictable chronic mild stress (UCMS) and functional brain  
6 connectivity measurement and paradigm for behavioral assay. (b) Representative mouse  
7 trajectory map for both naive and stressed groups in the open field test (OFT) and elevated  
8 plus maze (EPM); warm colors represent high time spent. (c) *Left*, time spent in central  
9 compartment; *middle*, time spent in the open arms; *right*, open-arm entries of naive control  
10 (n=9) and stressed groups (n=15) (Unpaired *t* test, *left*,  $t = 2.401$ ,  $P = 0.0241$ ; *middle*,  $t = 7.145$ ,  
11  $P < 0.0001$ ; *right*,  $t = 3.214$ ,  $P = 0.0040$ ). (d) *Left* serum CRH and *right* NE concentrations of  
12 naive control (n=6) and stressed groups (n=8) (Unpaired *t* test, *left*,  $t = 2.671$ ,  $P = 0.0204$ ; *right*,  
13  $t = 5.865$ ,  $P < 0.0001$ ). (e) Correlation matrices derived from global fMRI BOLD signal analysis  
14 (pseudocolor map of *t* statistics after thresholding at a false discovery rate,  $q$  of 0.05) across  
15 brain regions in stressed compared to wild-type naive littermates; warm colors represent  
16 higher correlations. (f) Correlation of BOLD synchronization in BNST-NAc in stressed (n=7)  
17 and naive littermates (n=5) (Unpaired *t* test,  $t = 2.698$ ,  $P = 0.0108$ ). (g) Schematic showing  
18 local field potential recording strategy. (h) Coherence between LFP signals recorded from NAc  
19 and BNST in stressed (n=7) and naive control mice (n=7). (i) Coherence in *theta* (4-8 Hz),  
20 *alpha* (8-12 Hz), *beta* (12-30 Hz) and *low gamma* (30-50 Hz) bands in NAc and BNST  
21 (Unpaired *t* test, *Theta*:  $t = 0.8605$ ,  $P = 0.3934$ , *alpha*:  $t = 2.512$ ,  $P = 0.0151$ , *beta*:  $t = 2.584$ ,  $P$   
22  $= 0.0126$ , *low gamma*:  $t = 2.856$ ,  $P = 0.0061$ ). (j-k) Sum of power spectra obtained for LFP

1 recordings in NAc shell (Unpaired *t* test, *theta*:  $t = 2.974$ ,  $P = 0.0058$ , *alpha*:  $t = 0.5235$ ,  $P =$   
2  $0.6045$ , *beta*:  $t = 0.764$ ,  $P = 0.4509$ , *low gamma*:  $t = 0.1712$ ,  $P = 0.8652$ ) and BNST (Unpaired *t*  
3 test, *theta*:  $t = 3.114$ ,  $P = 0.004$ , *alpha*:  $t = 2.226$ ,  $P = 0.0337$ , *beta*:  $t = 1.203$ ,  $P = 0.2383$ , *low*  
4 *gamma*:  $t = 1.341$ ,  $P = 0.1901$ ). \* $P < 0.05$ , \*\* $P < 0.01$  and \*\*\* $P < 0.0001$ . Error bars (c-d, f, i, j, k)  
5 are mean $\pm$ SEM. In H, the curves and shaded areas indicate the mean $\pm$ SEM.

6

7 **Fig 2. Accumbal PV neurons exhibit higher excitability in chronically stressed mice, and**  
8 **are responsible for excessive avoidance of anxiogenic locations**

9 (a-b) Representative images showing the distribution of PV neurons (green) in NAc and BNST;  
10 *left*, scale bar, 100  $\mu\text{m}$ ; *right*, scale bar, 50  $\mu\text{m}$ . (c) Schematic showing selective expression of  
11 ChR2 into the sNac<sup>PV</sup> neurons for whole-cell patch clamp recordings. (d) Representative  
12 traces showing action potential spiking in sNac<sup>PV</sup> neurons ( $n=4$  mice per group). (e) The  
13 input–output curve of injected currents versus spiking frequency. (f) Spiking frequency of PV  
14 neurons in naive and stressed mice during the injection of a current (100 pA,  $n = 6-8$  cells from  
15 4 mice per group, unpaired *t* test, \* $P < 0.05$ ; \*\* $P < 0.01$ ). (g-h). RMP and threshold of naive and  
16 stressed mice ( $n = 6-8$  cells from 4 mice per group, unpaired *t* test, \* $P < 0.05$ ; \*\* $P < 0.01$ ). (i)  
17 Schematic showing chemogenetic inhibition of sNac<sup>PV</sup> neurons. (j-k) Mean time spent in open  
18 arms and entries to the open arms with or without chemogenetic inhibition of sNac<sup>PV</sup> neurons  
19 ( $n = 10-12$  mice per group, unpaired *t* test, \* $P < 0.05$ ; \*\* $P < 0.01$ ; \*\*\* $P < 0.001$ ).

20

21 **Fig 3. Different neuronal populations in the NAc shell show distinct firing**  
22 **preference before and during exploration of anxiogenic environments.**

23 (a) Scatter plot of the firing rate and peak-to-peak width for 98 units from 9 mice. *Inset*,



1 representative waveforms from an identified Non-FS (blue) and FS (red) neuron; ISVD, initial  
2 slope of valley decay; HDT, valley half decay time. (b) *Left*, mean firing rates of FS and Non-FS  
3 neurons (Mann-Whitney rank sum test, n of FS = 5, n of Non-FS = 28,  $t = 155$ ,  $***P \leq 0.001$ );  
4 *right*, burst number of FS and Non-FS neurons (Mann-Whitney rank sum test, n = 5 (FS), n =  
5 28 (Non-FS),  $t = 155$ ,  $***P \leq 0.001$ ). (c) Scatter plot showing the firing rate of FS neurons  
6 between closed and open arms (Paired  $t$  test, n = 5,  $t = -2.620$  with 4 degrees of freedom,  
7 \*one-tailed  $P = 0.032$ ). (d) Z-scores of FS neurons during movement from the closed to open  
8 arms (nonparametric Kolmogorov-Smirnov test, n = 5,  $*P < 0.05$ , see in Methods); *inset*,  
9 horizontal and vertical arms represent closed and open arms, respectively. (e) Correlation  
10 between locomotion and firing rates of the FS neurons. (f) Scatter plot showing the firing rates  
11 of Non-FS neurons in closed and open EPM arms (Paired  $t$  test, n = 28,  $t = 0.179$  with 27  
12 degrees of freedom,  $P = 0.86$ ). (g) There was no difference in individual Non-FS neuron firing  
13 rates between closed and open arms. (h) Schematic showing fiber photometry recording  
14 strategy. (i-k) *Left*, normalized NAc  $Ca^{2+}$  activity maps from different neuron populations in the  
15 EPM (warm colors, high activity), binned by time (s) from the EPM crossing point (*inset*, red  
16 point); *inset*, horizontal and vertical arms represent open and closed arms, respectively; *right*,  
17 normalized NAc  $Ca^{2+}$  transients of different neuron populations in the EPM open arms  
18 compared to closed arms (Wilcoxon test, n = 250,  $*P < 0.05$ ). (l) Mean activity traces from  
19 different NAc neuron populations during the EPM. (m) Comparison of the firing onset between  
20 PV and D2 cells when mice were approaching the crossing point in the EPM (n = 19 trials). (n)  
21 Normalized  $Ca^{2+}$  transients in NAc PV neurons was correlated with anxiety state (Open arm  
22 exploration time) (linear regression,  $F(1, 248) = 316.4$ ,  $R^2 = 0.56$ ,  $P < 0.0001$ , n = 8 mice).

1 **Fig 4. Activation of PV neurons in sNac is required for anxiety-related avoidance.**  
2 (a) *Left*, Schematic showing optrode placement in the NAc shell; *Top right*, ChR2-mCherry  
3 neurons (red) in NAc co-expressed PV (green); scale bar, 100  $\mu\text{m}$ ; *bottom right*, higher  
4 magnification of the co-staining (merged, yellow; scale bar, 10  $\mu\text{m}$ ). (b) *Top left*, schematic  
5 showing patch clamp technique; *bottom left*, sample of light-evoked PV neuronal action  
6 potentials; *right*, the action potential frequency of PV neurons following different light  
7 stimulation frequency from 5-80Hz. Comparison of (c) open arm entries and (d) time spent in  
8 the open arm between PV-ChR2 and PV-mCherry groups ( $n = 7$ ,  $t$  test,  $*P < 0.05$ ). (e)  
9 Comparison of time spent in the central area during OFT between PV-ChR2 and PV-mCherry  
10 groups ( $n = 7$  per group, Two-way ANOVA,  $**P < 0.01$ ,  $F_{3,18} = 5.99$ ; Bonferroni post hoc  
11 analysis,  $*P < 0.05$ ,  $**P < 0.01$ ). (f) Mean velocity of PV-ChR2 and PV-mCherry groups during  
12 OFT ( $n = 7$  per group, Two-way ANOVA,  $P = 0.1827$ ,  $F(3, 18) = 1.8$ ; Bonferroni post hoc  
13 analysis). (g) Protocol schematic for selective chemogenetic inhibition of PV neurons in the  
14 sNac. (h) Immunostaining showing targeted hM<sub>4</sub>D<sub>i</sub> expression (red) in PV neurons (green) of  
15 sNac in PV-Cre mice; scale bar, 50  $\mu\text{m}$ . (i) Representative mice thermal tracks for *left*  
16 PV-mCherry and *right* PV- hM<sub>4</sub>D<sub>i</sub> groups during OFT. (j-k) Mean number of entries to center  
17 ( $n = 8$ , Paired  $t$  test,  $t = 2.829$ ,  $df = 7$ ,  $*P = 0.0254$ ) and mean time in the center ( $n = 8$ , Paired  $t$   
18 test,  $t = 2.448$ ,  $df = 7$ ,  $*P = 0.0442$ ). (l) Representative mice thermal tracks for *left* PV-mCherry  
19 and *right* PV- hM<sub>4</sub>D<sub>i</sub> groups during EPM task. (m-n) Mean number of open arm entries ( $n =$   
20 10-11, unpaired  $t$  test,  $t = 2.739$ ,  $df = 19$ ,  $*P = 0.013$ ) and mean time in open arms ( $n = 10-11$ ,  
21 unpaired  $t$  test,  $t = 3.053$ ,  $df = 19$ ,  $**P = 0.0065$ ).  
22

23 **Fig. 5 Monosynaptic GABAergic inputs to sNac<sup>PV</sup> neurons mainly stem from the**

1 **adBNST.**

2 (a) Schematic showing sNac injections of AAV-Ef1 $\alpha$ -DIO-TVA-eGFP (AAV2/9) virus and  
3 AAV-Ef1 $\alpha$ -DIO-RG (AAV2/9) on day 1 and RV-EvnA-DsRed on day 21 in PV-Cre mice to  
4 retrogradely trace input neurons (red) to NAc shell (yellow, starter neurons). (b) RV-mediated  
5 transsynaptic retrograde tracing of NAc inputs; fluorescence images of NAc region (coronal  
6 diagram) in PV-Cre mice (n = 3 mice); Scale bar, 100  $\mu$ m; *inset*, enlarged view of the region in  
7 the dotted white box, showing starter cells (yellow, expressing both eGFP and DsRed,  
8 indicated by white arrowheads; scale bar, 50  $\mu$ m.) (c) Typical coronal-section planes with  
9 distance (anterior-posterior) from bregma showing dsRed-expressing presynaptic neurons  
10 retrogradely labeled by NAc injection of virus in PV-Cre mice; scale bar, 100  $\mu$ m; Hippo,  
11 hippocampus; BLA, basolateral amygdala; CeA, central amygdala; PVT, paraventricular  
12 thalamus; mPFC, medial prefrontal cortex; LH, lateral hypothalamus; VTA, ventral tegmental  
13 area; BNST, bed nucleus of the stria terminalis. (d) Overview of inputs to NAc PV neurons (n =  
14 3 mice per region giving a total of 12-39 slices). (e) Sections were co-stained with antibodies  
15 against RFPn (RV) (red) and riboprobes (cyan) for *Gad1/2*; scale bar, 50  $\mu$ m. (f) Approximately  
16 96.1% of RV-infected neurons were co-labeled for *Gad1/2* in the adBNST (n = 12 slices, from 3  
17 mice).

18

19 **Fig. 6 Optogenetic stimulation of adBNST GABAergic terminals in sNac produces**  
20 **an anxiolytic effect, which is mediated by sNac<sup>PV</sup> neurons.**

21 (a) Schematic showing the strategy for selective optogenetic manipulation of GABAergic  
22 afferents from adBNST onto sNac<sup>PV</sup> neurons and recording postsynaptic inhibitory potentials  
23 (IPSP). (b-c) Representative image showing that most ChR2 positive cells in adBNST

1 co-expressed GAD1/2 mRNA (n = 3 mice); scale bar, 100  $\mu$ m. (d) *Top*, mean eIPSPs obtained  
2 from PV neurons within the NAc shell (*bottom*) was blocked by 20  $\mu$ M bicuculline. (e) The  
3 eIPSP amplitude of PV neurons following different light stimulation duration from 1-20 ms. (f)  
4 Quantification of eIPSP amplitude (*left*, n = 7 cells from 4 mice) and latency (*right*, n = 7 cells  
5 from 4 mice). (g) Schematic showing optogenetic illumination of adBNST GABAergic afferent  
6 fibers that innervate NAc<sup>PV</sup> neurons. (h) Representative image showing adBNST GABAergic  
7 afferent axons innervating the PV neurons within NAc shell. Scale bar, 10  $\mu$ m. (i-j) Mean time  
8 spent in the center (n = 8 mice per group, unpaired *t* test, \**P* < 0.05; \*\**P* < 0.01; \*\*\**P* < 0001)  
9 and in open arms (n = 8 mice per group, unpaired *t* test, \**P* < 0.05; \*\**P* < 0.01; \*\*\**P* < 0001)  
10 with or without optogenetic stimulation of adBNST GABAergic afferent axons innervating PV  
11 neurons within NAc shell. (k) Schematic showing viruses injected into the adBNST and NAc  
12 shell. Three groups: Control, BNST<sup>mCherry</sup>-NAc<sup>GFP</sup>; GFP, BNST<sup>Chr2</sup>-NAc<sup>GFP</sup>; taCasp3,  
13 BNST<sup>Chr2</sup>-NAc<sup>taCasp3</sup>. In each mouse, an optical fiber was implanted above the NAc shell for  
14 optogenetic illumination of adBNST GABAergic outputs. (l) Representative images showing  
15 selective deletion of PV neurons in the NAc shell; Scale bar, 100  $\mu$ m. (m-n) Mean time spent in  
16 the center (n = 6-7 mice per group, unpaired *t* test, \**P* < 0.05; \*\**P* < 0.01; \*\*\**P* < 0001) and in  
17 open arms (n = 6-7 mice per group, unpaired *t* test, \**P* < 0.05; \*\**P* < 0.01; \*\*\**P* < 0001). (o)  
18 Schematic showing PPR of eIPSPs recorded from PV neurons within the NAc shell in  
19 wild-type and stressed PV-Cre mice during optogenetic stimulation of adBNST GABAergic  
20 afferents around PV neurons. (p) PPR of eIPSPs plotted as a function of interspike intervals  
21 (ISIs); (q) mean PPR measured at 50-ms interspike interval. \**P* < 0.05 (n = 4 from 3 mice per  
22 group, *t* test). (r) Schematic showing optogenetic stimulation of adBNST GABAergic afferents

- 1 around PV neurons in the sNAc on stressed mice. (s-t) Mean time in the center and open arms
- 2 (n =9 mice per group, unpaired *t* test, \**P* < 0.05; \*\**P* < 0.01; \*\*\**P* < 0.001).
- 3
- 4

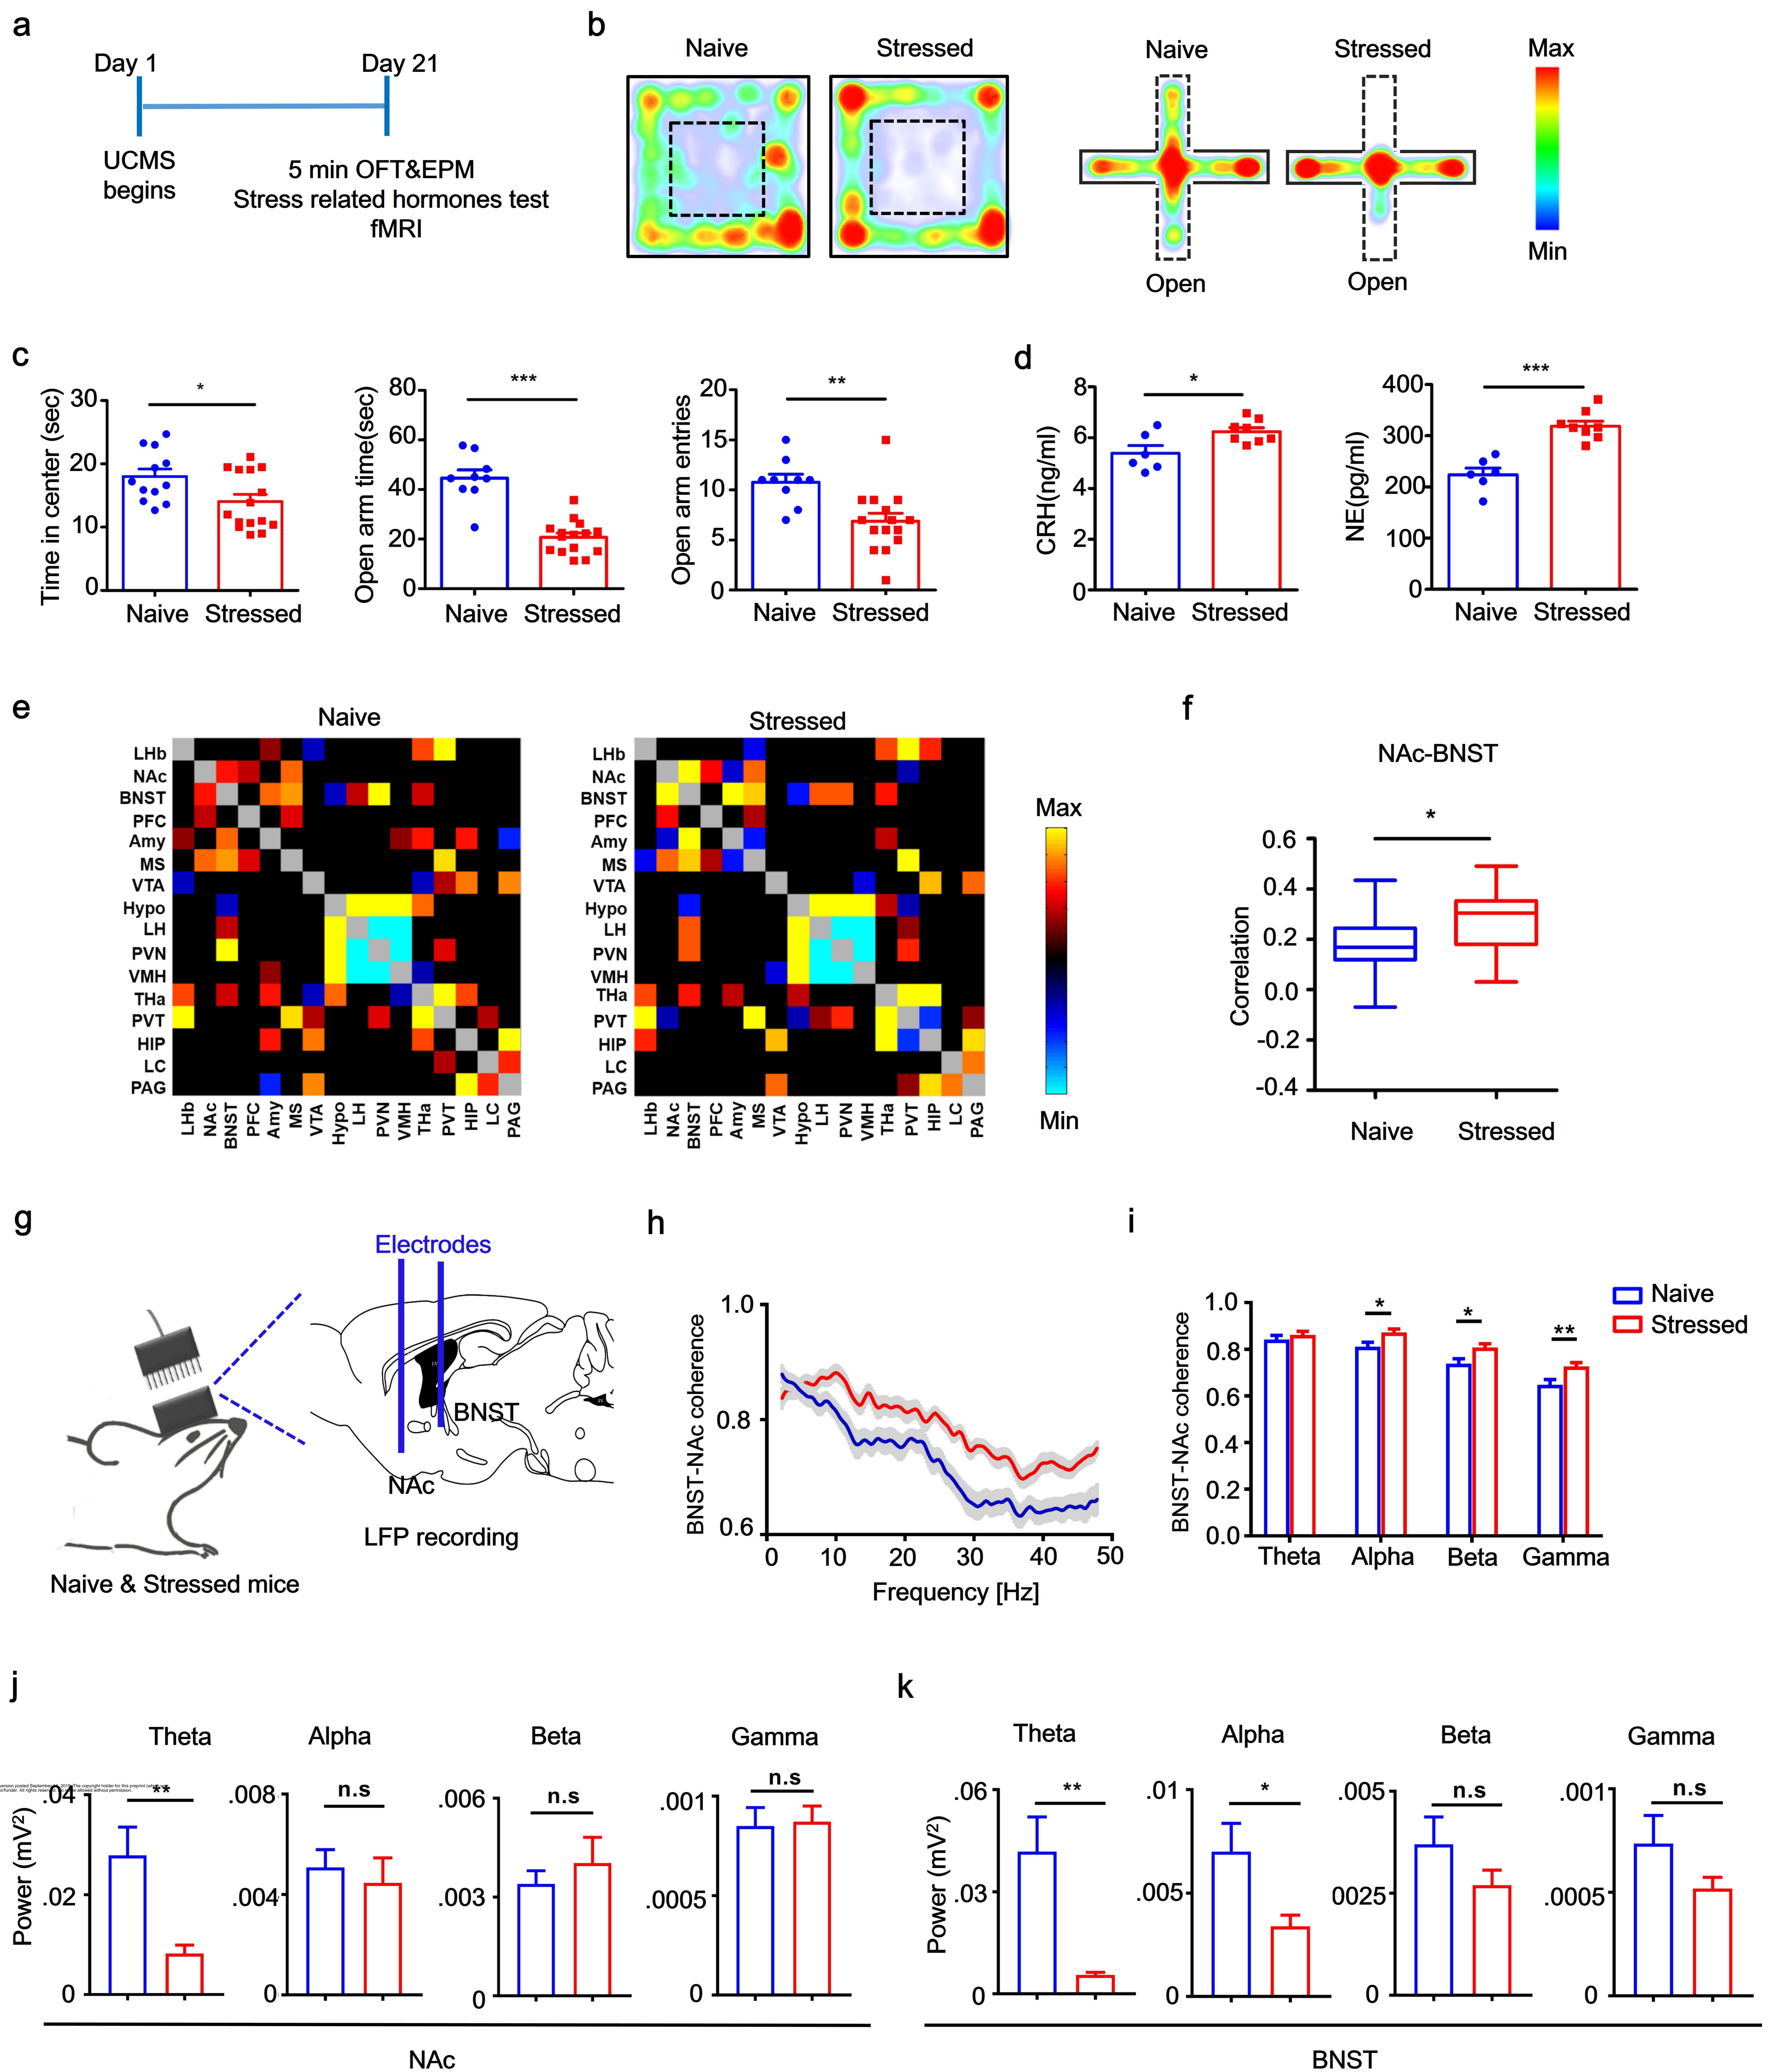

Fig. 1

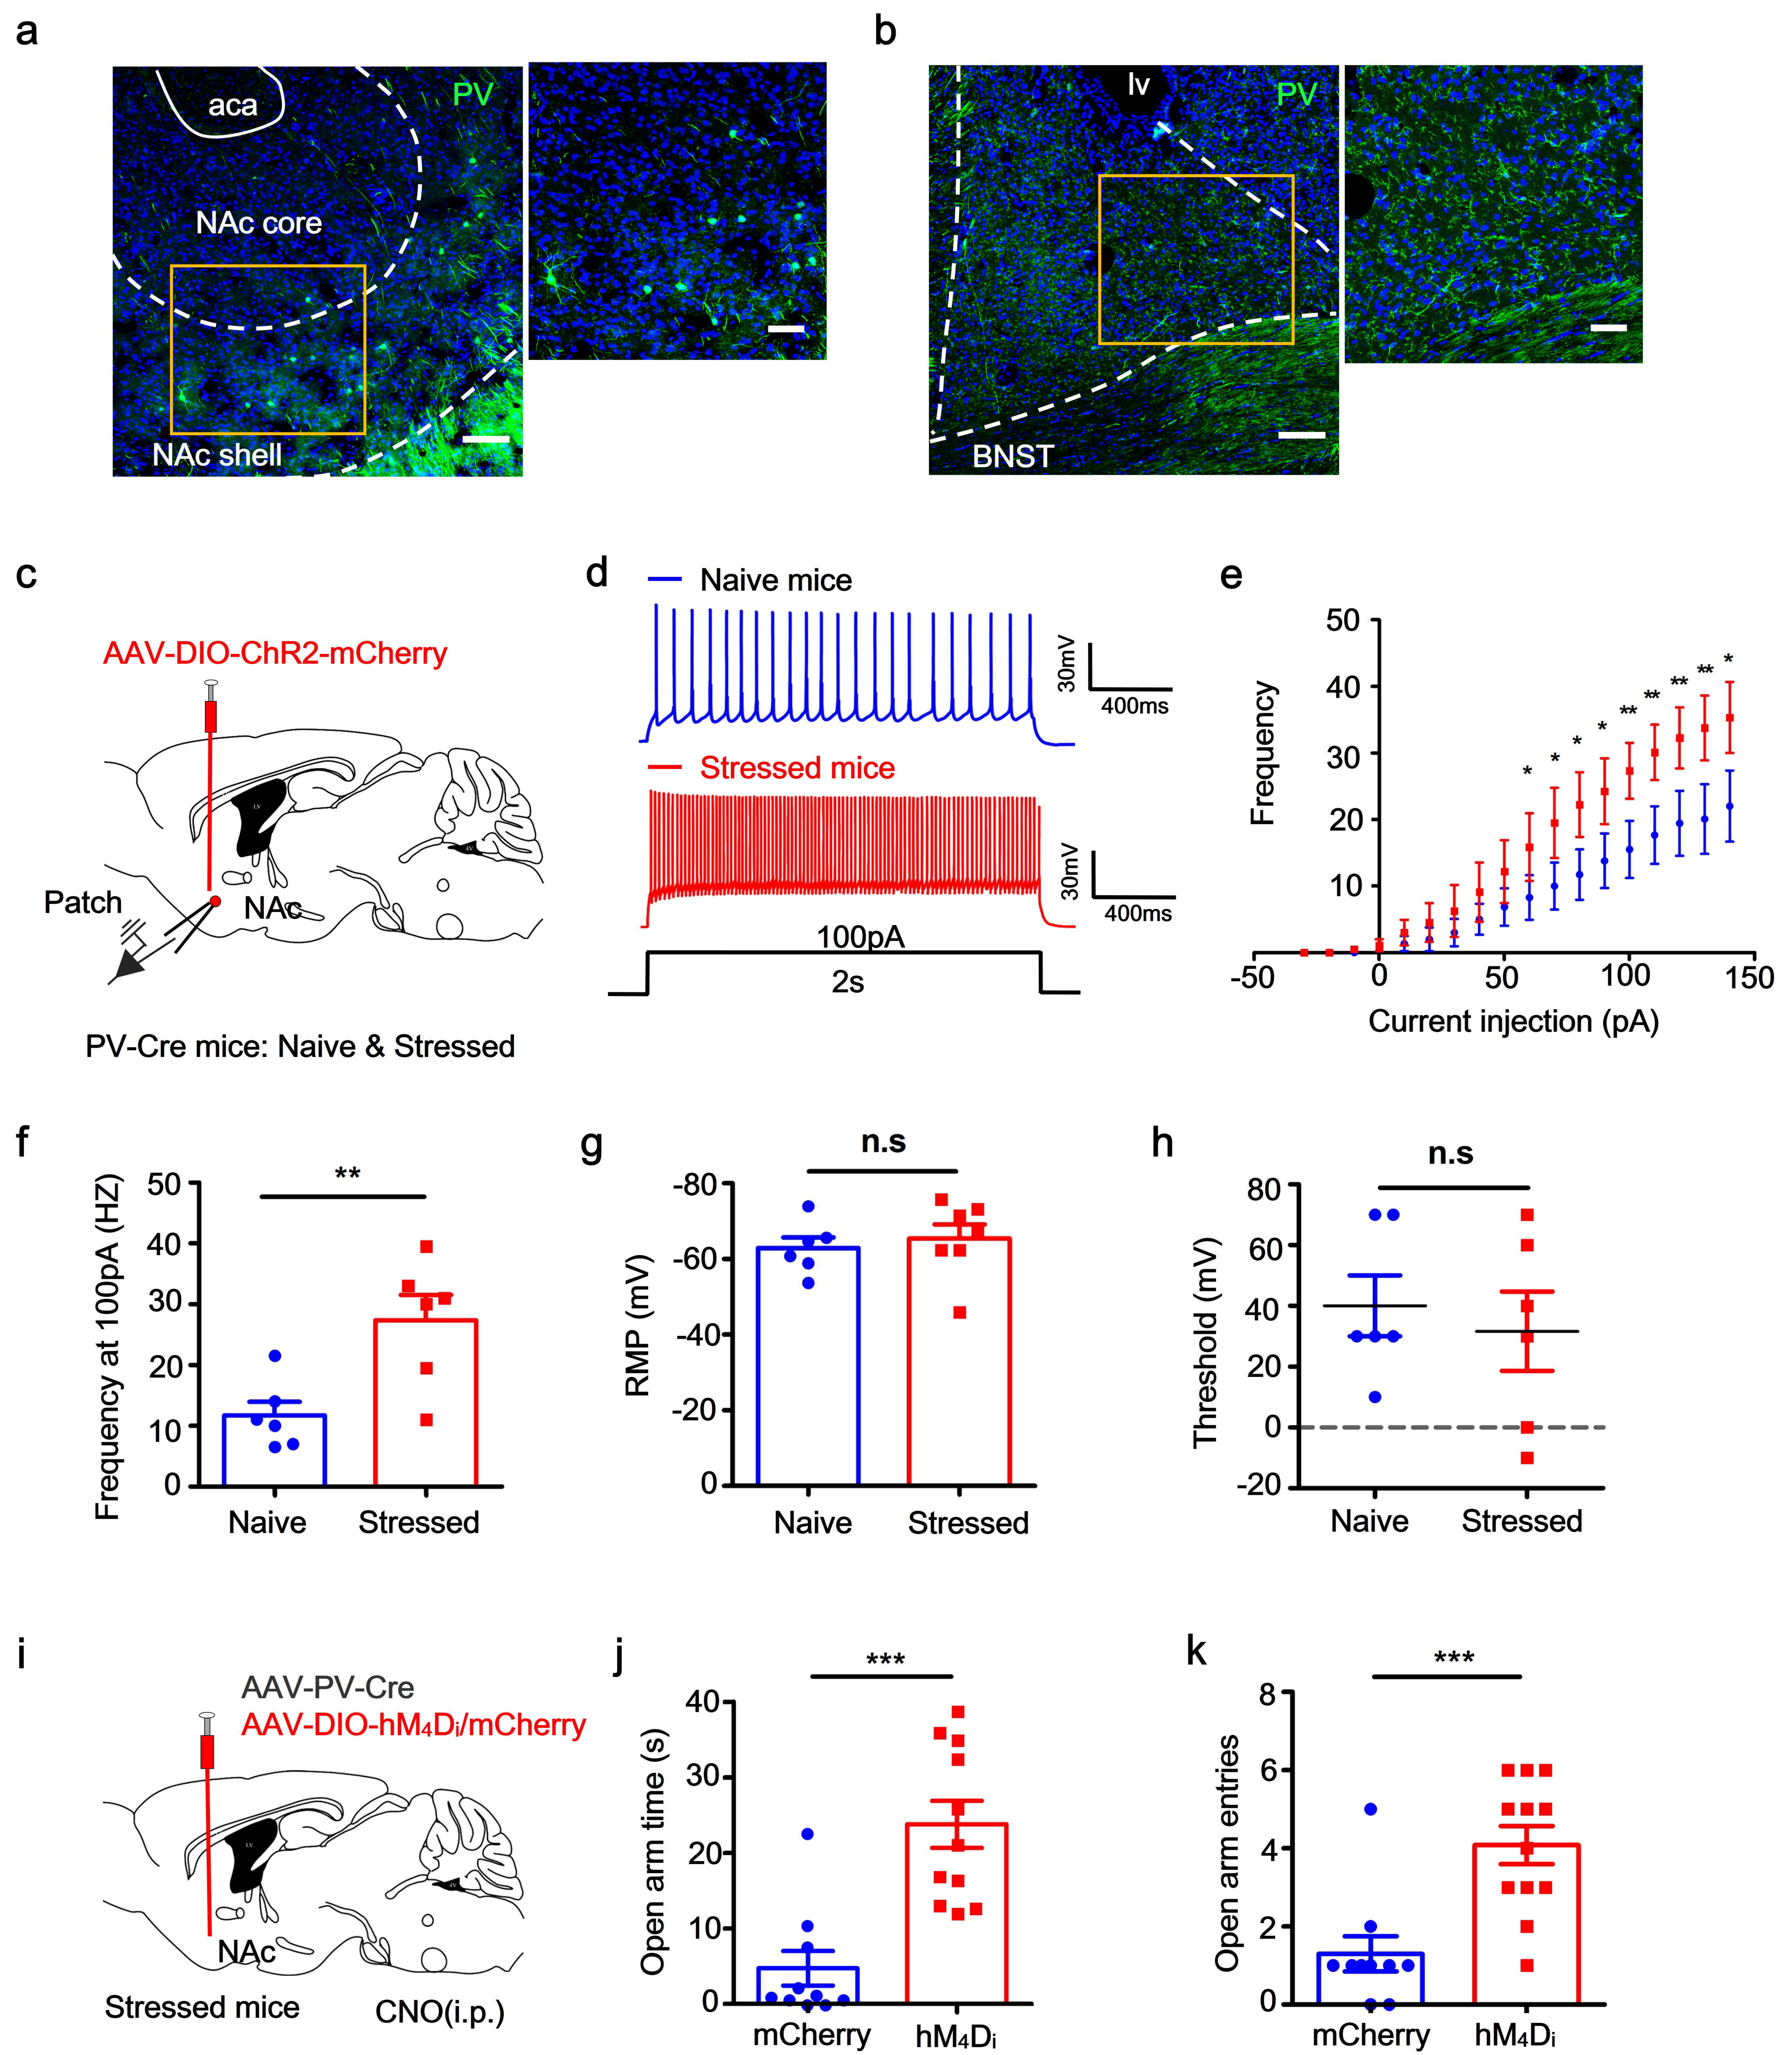

Fig. 2

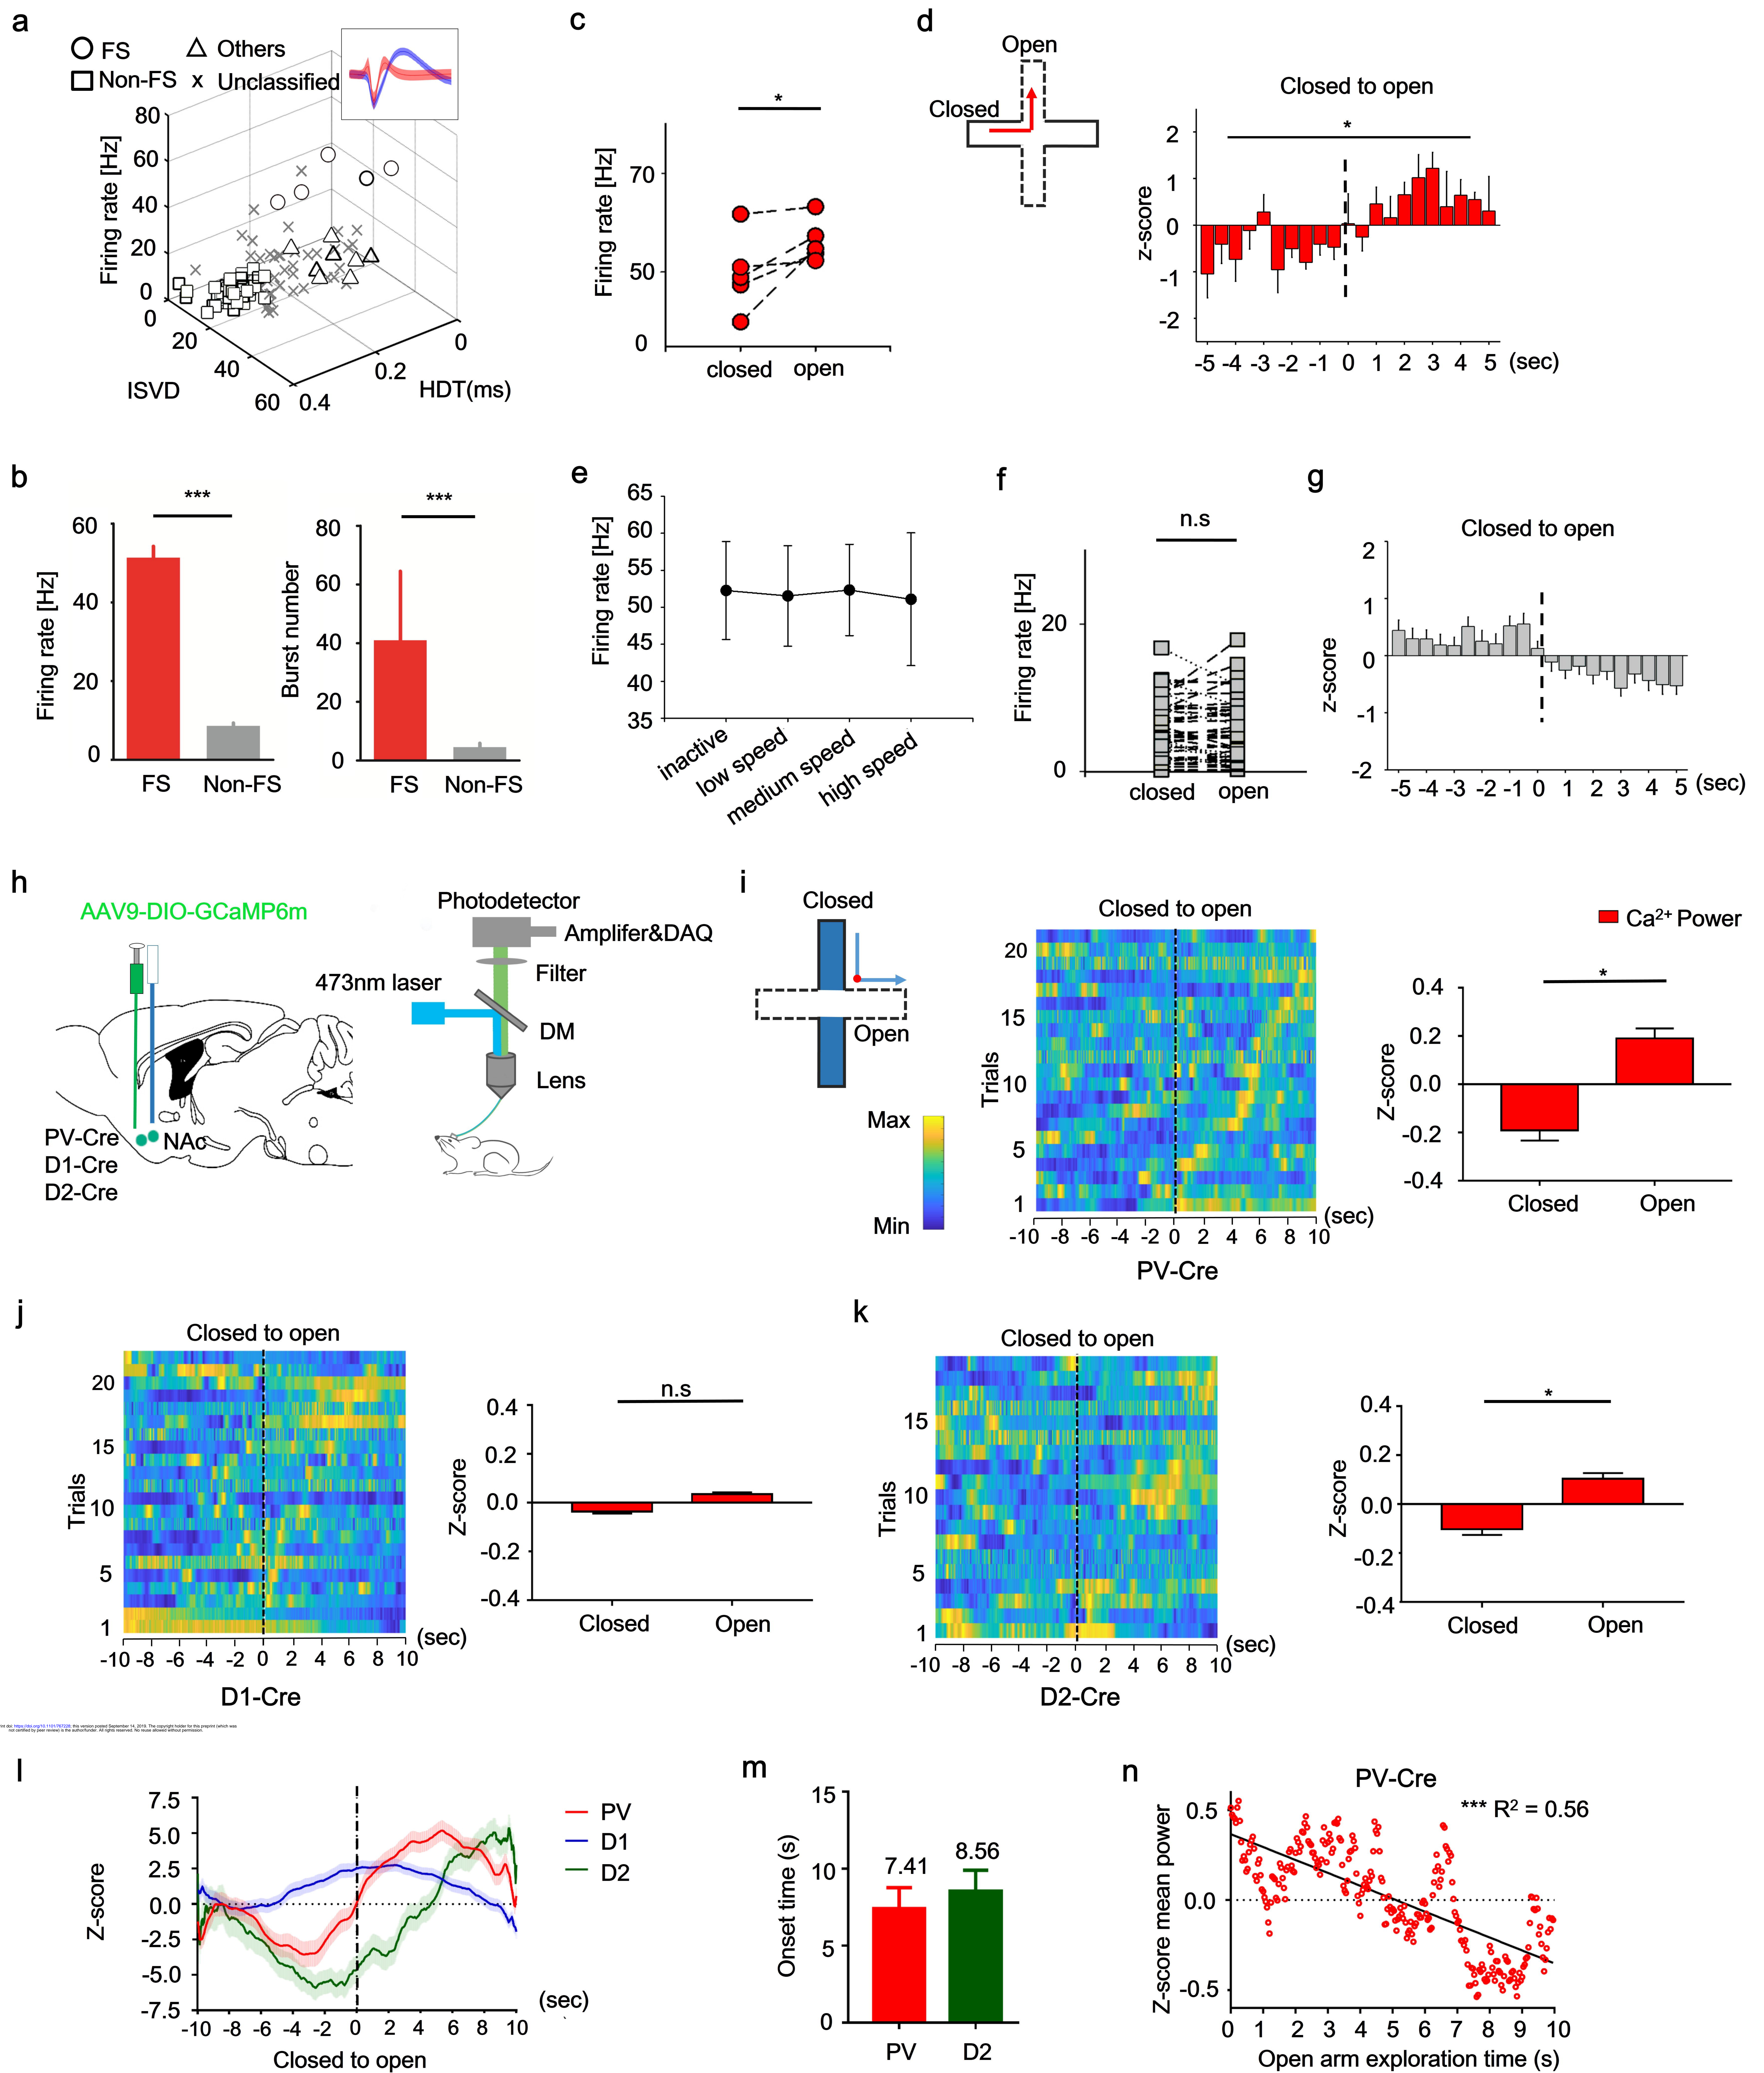

Fig.3



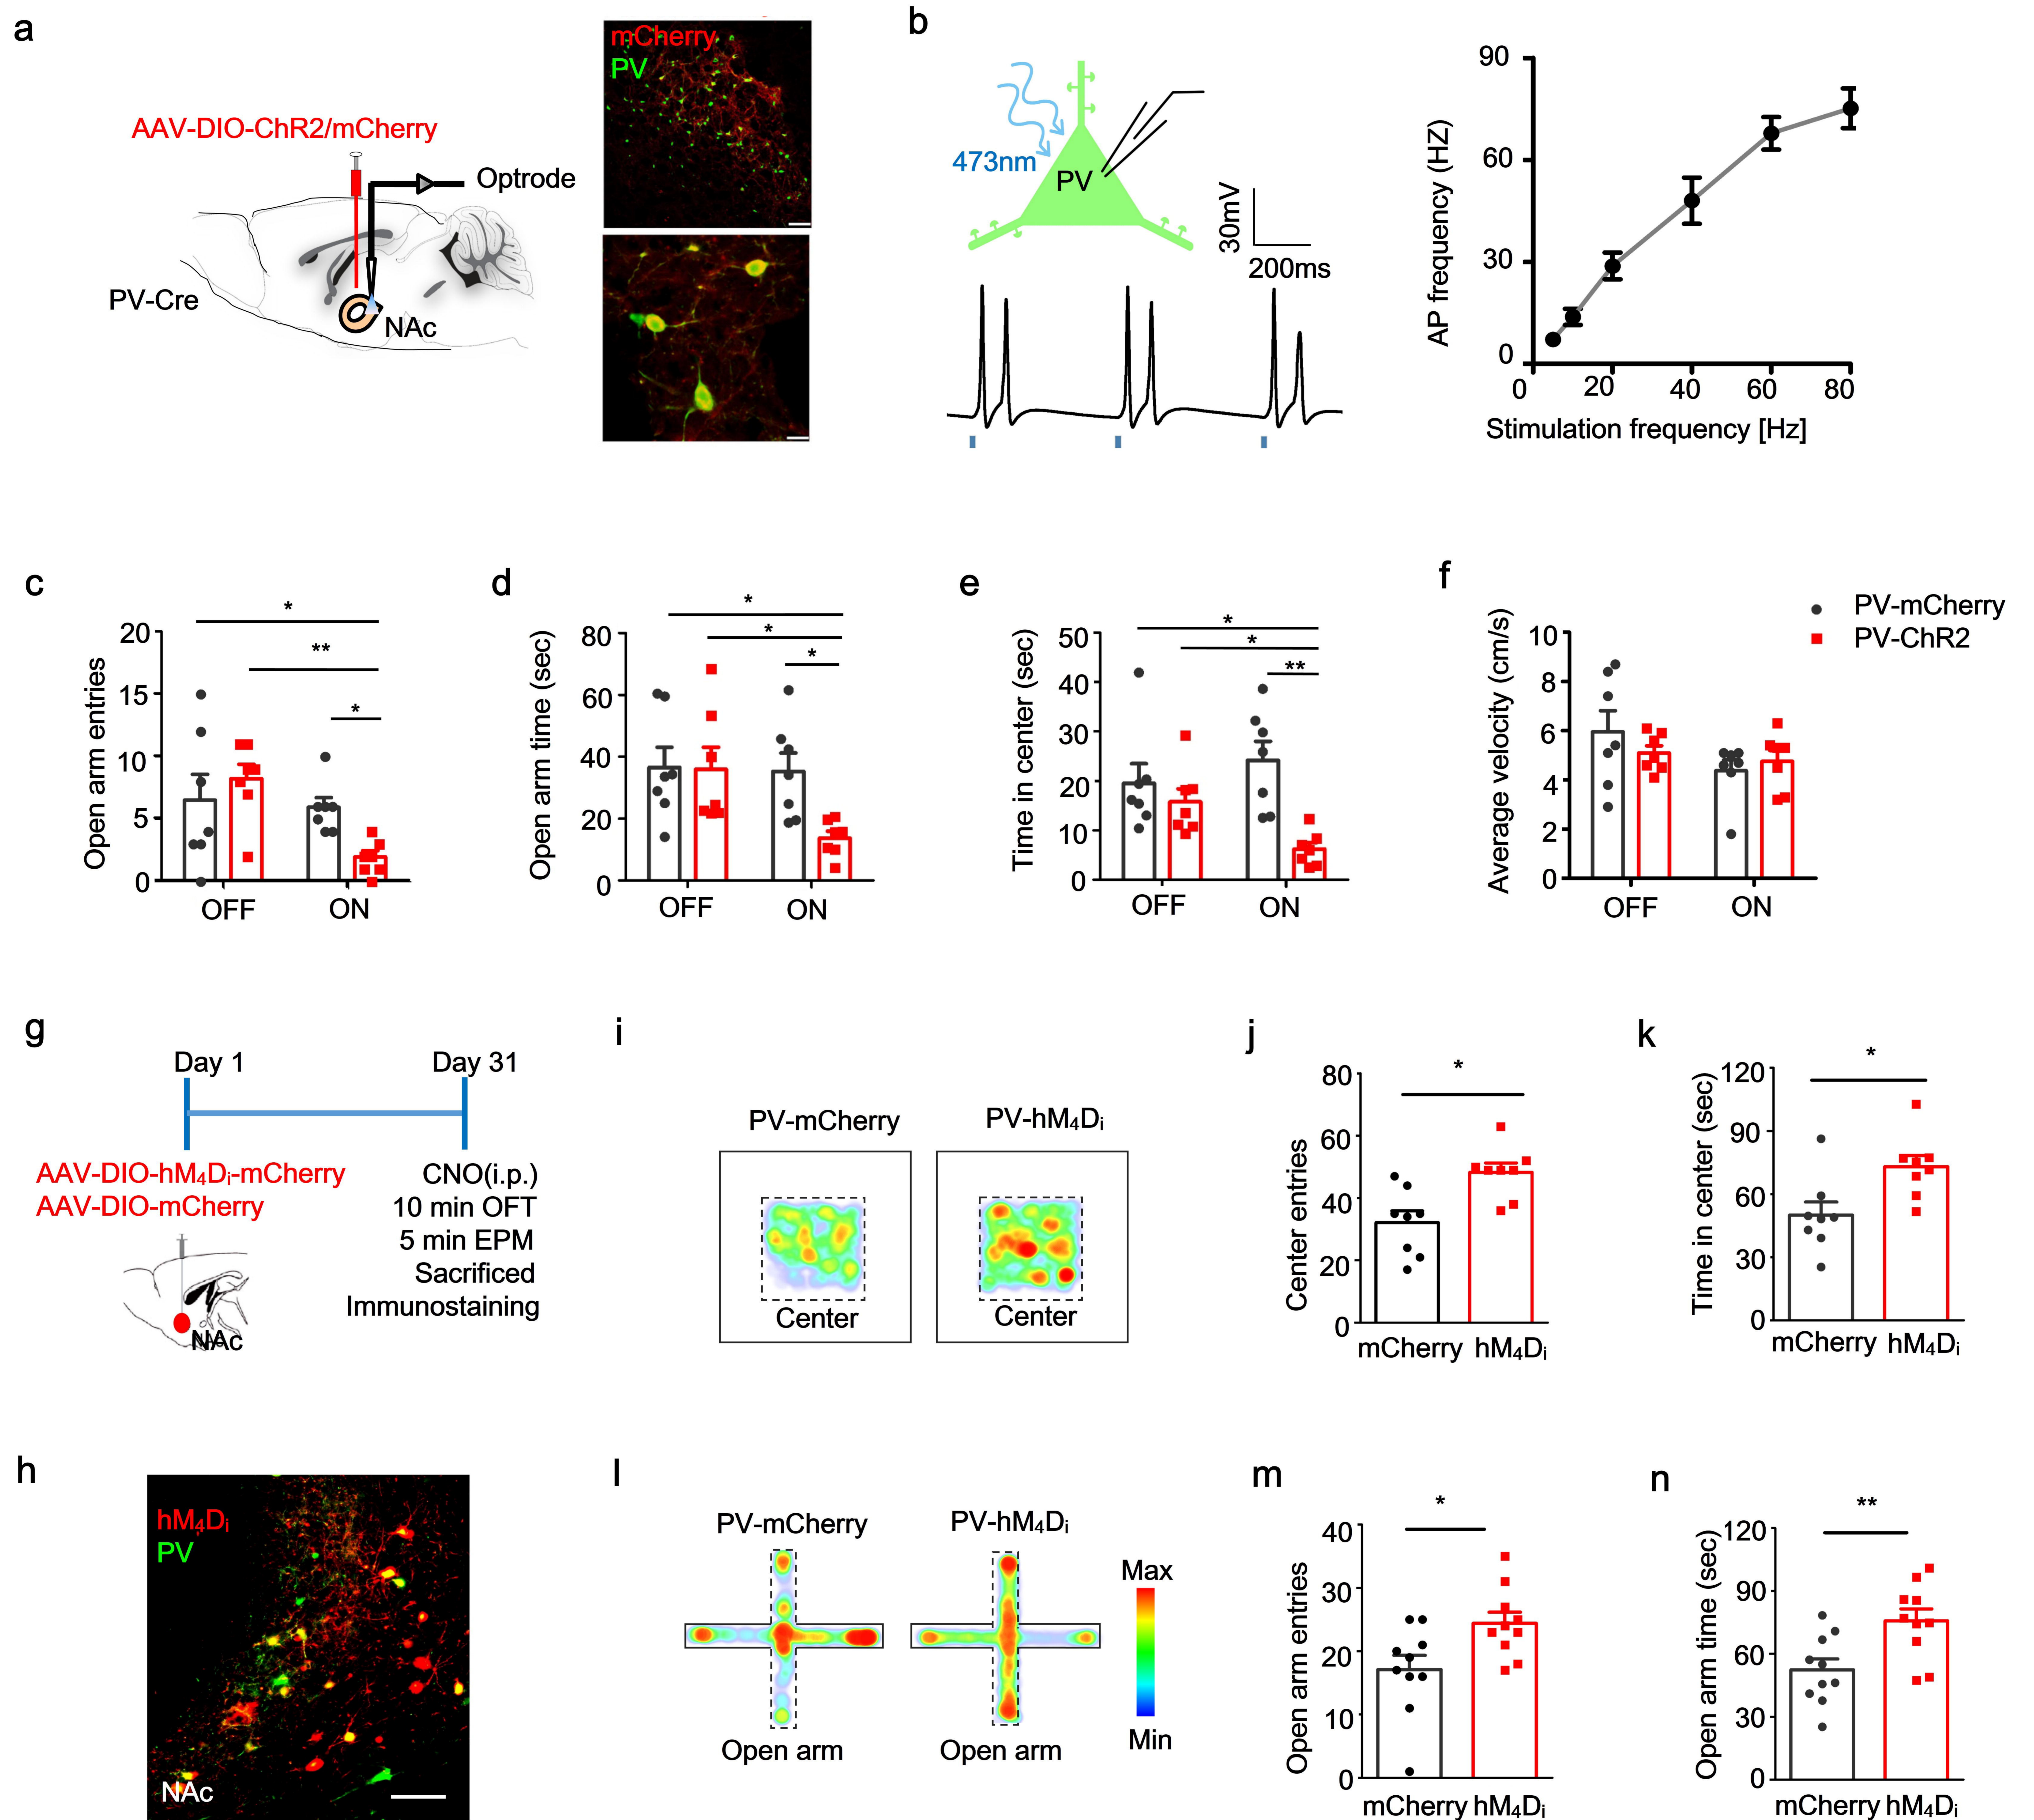

Fig. 4

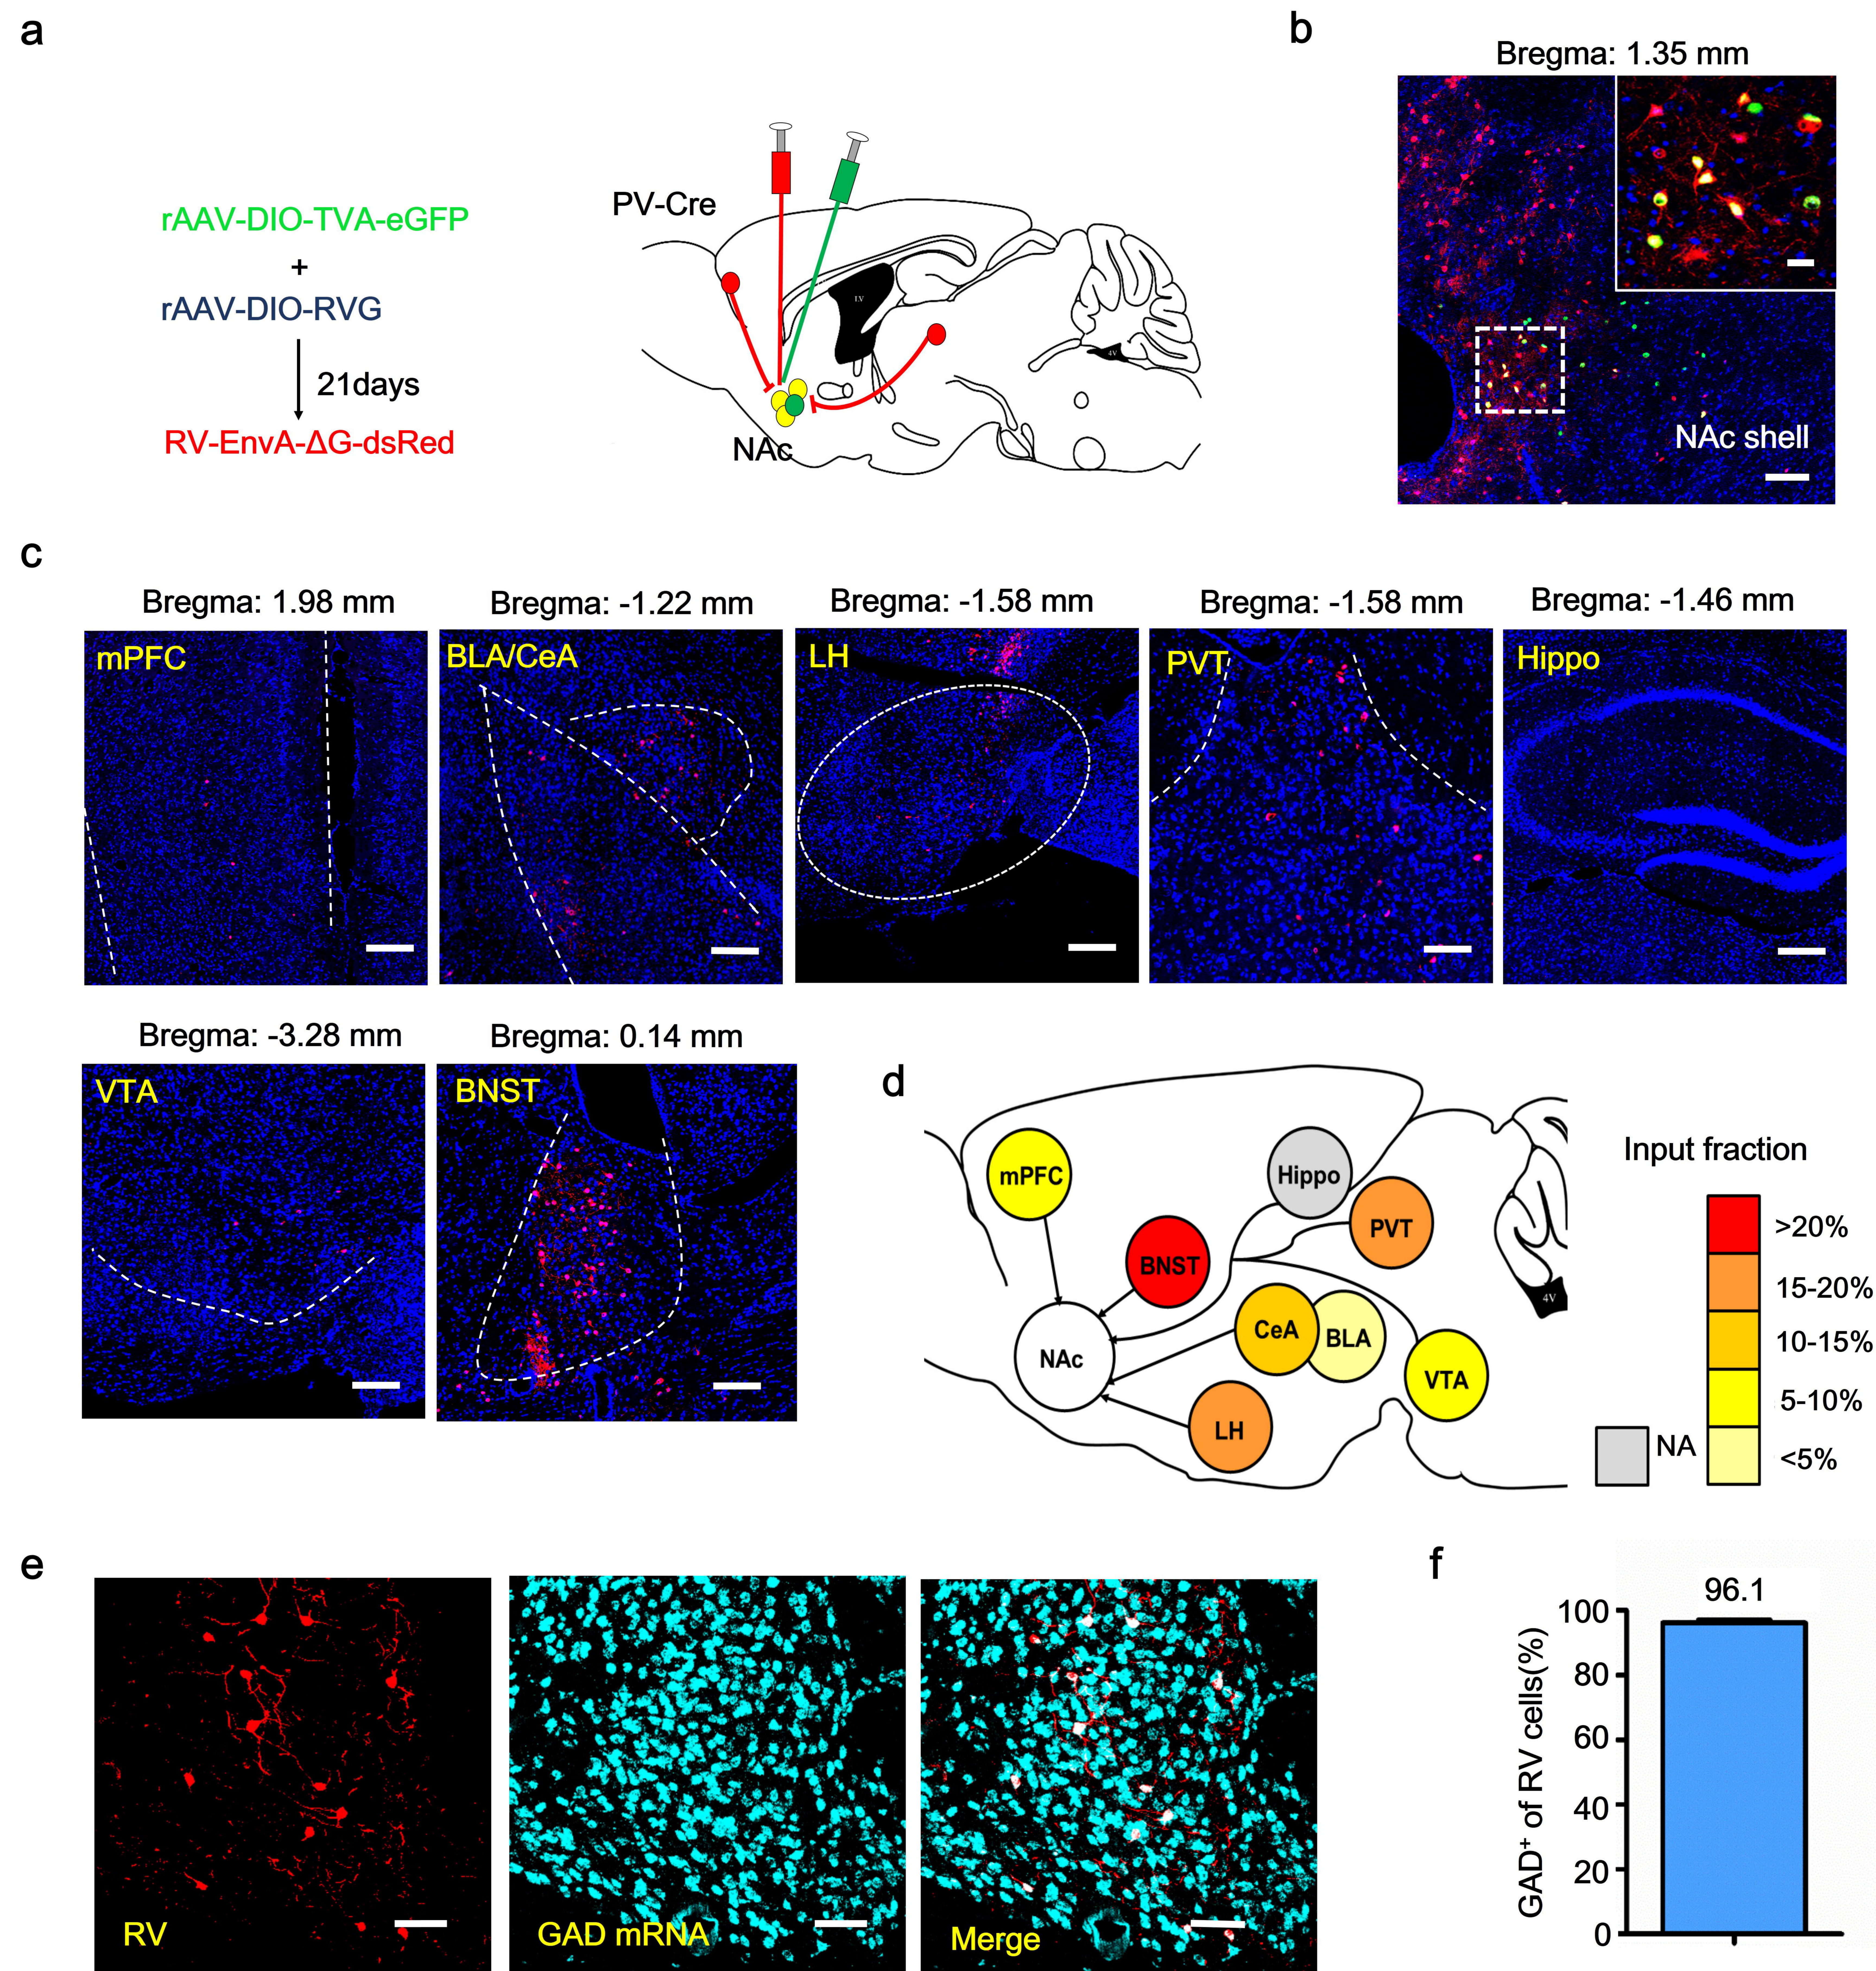

Fig. 5

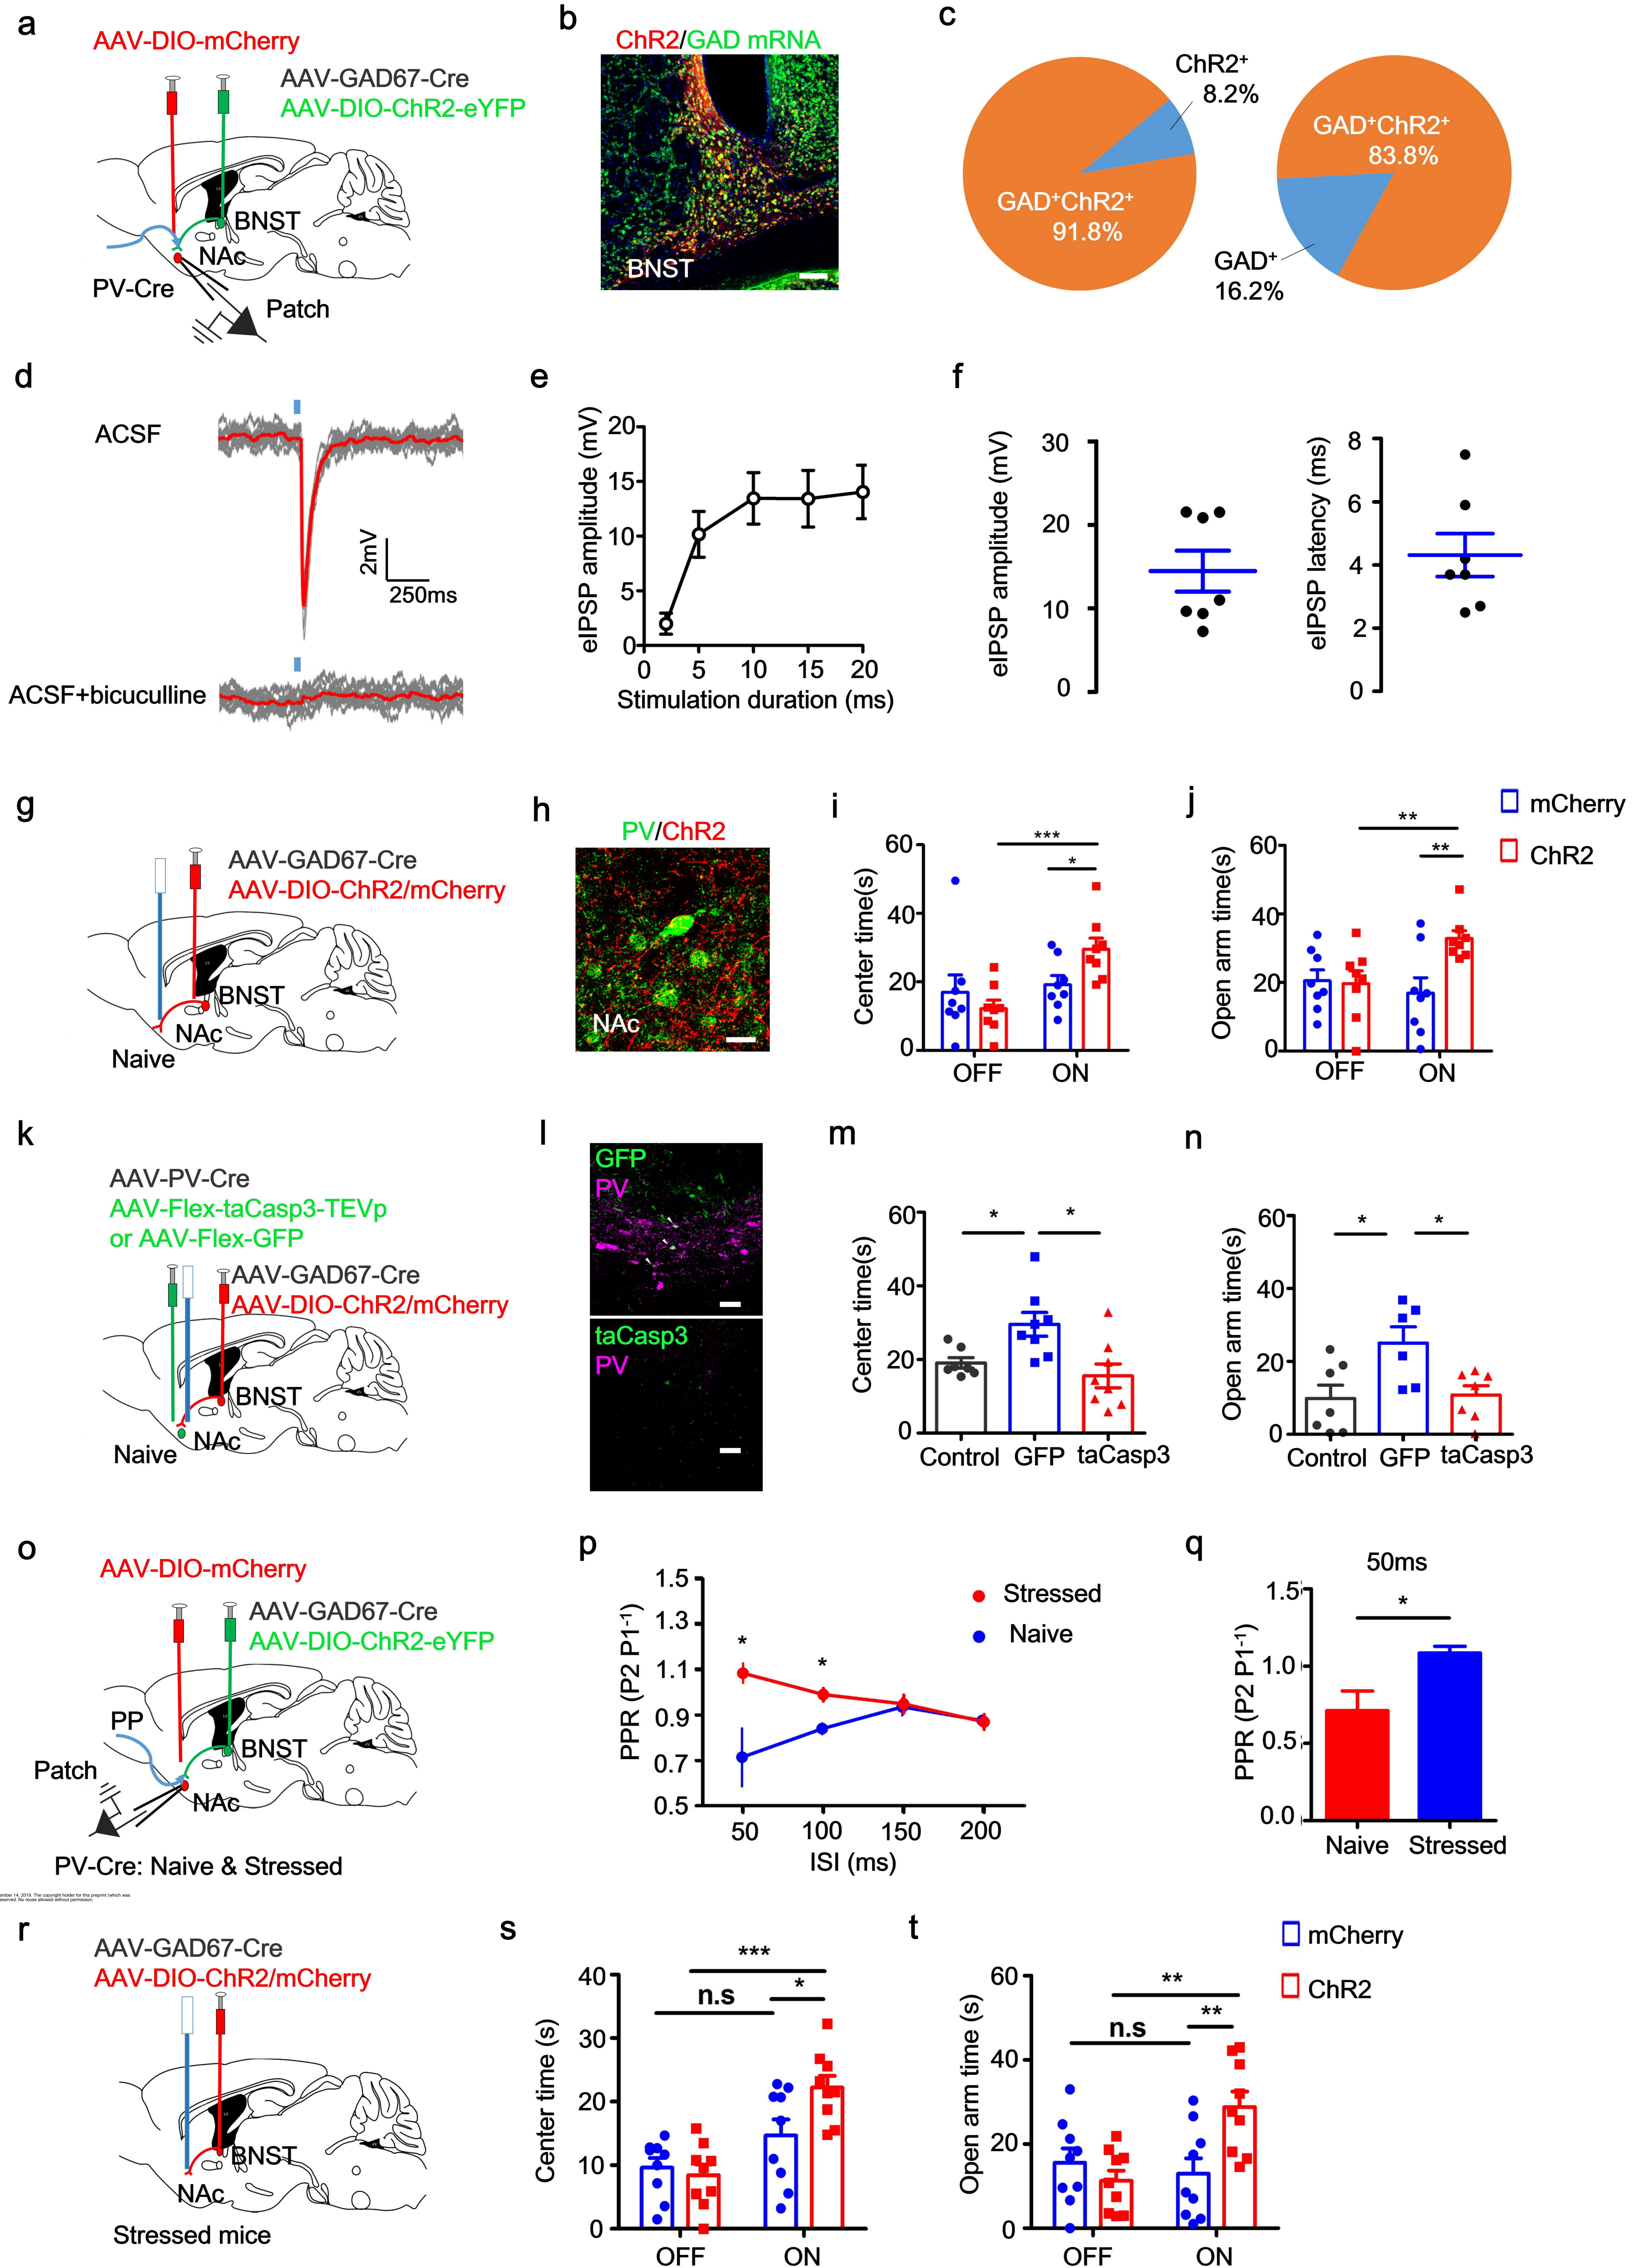

Fig. 6
